# Supplementary material
Source: ML conference proceedings conference paper supplement (https://proceedings.mlr.press/v70/hong17a.html)
Supplement: Supplementary file [file hong17a-supp.pdf]

1100 **Supplementary** 1155

1101 **8.3. Proof of Lemma 1** 1156

1102 From the optimality condition of the  $x$  problem (7a) we have 1157

$$1103 \nabla f(x^{r+1}) + A^T(\mu^r + \beta Ax^{r+1}) + \beta B^T B(x^{r+1} - x^r) = 0. \quad 1158$$

1104 Applying (7b), we have 1159

$$1105 A^T \mu^{r+1} = -\nabla f(x^{r+1}) - \beta B^T B(x^{r+1} - x^r). \quad 1160$$

1106 From equation (7b) ( $\mu^{r+1} = \mu^r + \beta A^T \mu^r$ ) it is clear the difference of the dual variables lies in the column space 1161  
 1107 of  $A$ . Therefore the following is true 1162

$$1108 \sigma_{\min}^{1/2} \|\mu^{r+1} - \mu^r\| \leq \|A^T(\mu^{r+1} - \mu^r)\|. \quad 1163$$

1109 This inequality combined with (33) implies that 1164

$$1110 \|\mu^{r+1} - \mu^r\| \leq \frac{1}{\sigma_{\min}^{1/2}} \left\| -\nabla f(x^{r+1}) - \beta B^T B(x^{r+1} - x^r) - (-\nabla f(x^r) - \beta B^T B(x^r - x^{r-1})) \right\| \quad 1165$$

$$1111 = \frac{1}{\sigma_{\min}^{1/2}} \left\| \nabla f(x^r) - \nabla f(x^{r+1}) - \beta B^T B w^r \right\|. \quad 1166$$

1112 Squaring both sides and dividing by  $\beta$ , we obtain the desired result. 1167

**Q.E.D.** 1168

1113 **8.4. Proof of Lemma 2** 1169

1114 Since  $f(x)$  has Lipschitz continuous gradient, and that  $A^T A + B^T B \succeq I$  by Assumption [A1], it is known that if 1170  
 1115  $\beta > L$ , then the  $x$ -problem (7a) is strongly convex with modulus  $\gamma := \beta - L > 0$ ; See (Zlobec, 2005) [Theorem 1171  
 1116 2.1]. That is, we have 1172

$$1117 L_\beta(x, \mu^r) + \frac{\beta}{2} \|x - x^r\|_{B^T B}^2 - (L_\beta(z, \mu^r) + \frac{\beta}{2} \|z - x^r\|_{B^T B}^2) \quad 1173$$

$$1118 \geq \langle \nabla_x L_\beta(z, \mu^r) + \beta(B^T B(z - x^r)), x - z \rangle + \frac{\gamma}{2} \|x - z\|^2, \forall x, z \in \mathbb{R}^N, \forall \mu^r. \quad 1174$$

1119 Using this property, we have 1175

$$1120 L_\beta(x^{r+1}, \mu^{r+1}) - L_\beta(x^r, \mu^r) \quad 1176$$

$$1121 = L_\beta(x^{r+1}, \mu^{r+1}) - L_\beta(x^{r+1}, \mu^r) + L_\beta(x^{r+1}, \mu^r) - L_\beta(x^r, \mu^r) \quad 1177$$

$$1122 \leq L_\beta(x^{r+1}, \mu^{r+1}) - L_\beta(x^{r+1}, \mu^r) + L_\beta(x^{r+1}, \mu^r) + \frac{\beta}{2} \|x^{r+1} - x^r\|_{B^T B}^2 - L_\beta(x^r, \mu^r) \quad 1178$$

$$1123 \stackrel{(i)}{\leq} \frac{\|\mu^{r+1} - \mu^r\|^2}{\beta} + \langle \nabla_x L_\beta(x^{r+1}, \mu^r) + \beta(B^T B(x^{r+1} - x^r)), x^{r+1} - x^r \rangle - \frac{\gamma}{2} \|x^{r+1} - x^r\|^2 \quad 1179$$

$$1124 \stackrel{(ii)}{\leq} \frac{\|\mu^{r+1} - \mu^r\|^2}{\beta} - \frac{\gamma}{2} \|x^{r+1} - x^r\|^2 \quad 1180$$

$$1125 \leq \frac{1}{\sigma_{\min}} \left( \frac{2L^2}{\beta} \|x^r - x^{r+1}\|^2 + 2\beta \|B^T B w^r\|^2 \right) - \frac{\gamma}{2} \|x^{r+1} - x^r\|^2 \quad 1181$$

$$1126 = - \left( \frac{\beta - L}{2} - \frac{2L^2}{\beta \sigma_{\min}} \right) \|x^{r+1} - x^r\|^2 + \frac{2\beta}{\sigma_{\min}} \|B^T B w^r\|^2 \quad 1182$$

1127 where in (i) we have used (34) with the identification  $z = x^{r+1}$  and  $x = x^r$  and the fact that 1183

$$1128 L_\beta(x^{r+1}, \mu^{r+1}) - L_\beta(x^{r+1}, \mu^r) = \langle \mu^{r+1} - \mu^r, A x^{r+1} \rangle = \frac{1}{\beta} \|\mu^{r+1} - \mu^r\|^2 \quad 1184$$

1129 ; in (ii) we have used the optimality condition for the  $x$ -subproblem (7a). The claim is proved. 1185

**Q.E.D.** 1186

1154

1209

1210 **8.5. Proof of Lemma 3** 1265

1211 From the optimality condition of the  $x$ -subproblem (7a) we have 1266

$$1212 \langle \nabla f(x^{r+1}) + A^T \mu^r + \beta A^T A x^{r+1} + \beta B^T B(x^{r+1} - x^r), x^{r+1} - x \rangle \leq 0, \forall x \in \mathbb{R}^Q. \quad (36)$$

1213 If we shift  $r$  to  $r - 1$ , we get 1267

$$1214 \langle \nabla f(x^r) + A^T \mu^{r-1} + \beta A^T A x^r + \beta B^T B(x^r - x^{r-1}), x^r - x \rangle \leq 0, \forall x \in \mathbb{R}^Q. \quad (36)$$

1215 Plugging  $x = x^r$  into the first inequality and  $x = x^{r+1}$  into the second, adding the resulting inequalities and 1270  
 1216 utilizing the  $\mu$ -update step (7b) we obtain 1271

$$1217 \langle \nabla f(x^{r+1}) - \nabla f(x^r) + A^T(\mu^{r+1} - \mu^r) + \beta B^T B w^r, x^{r+1} - x^r \rangle \leq 0. \quad (36)$$

1218 Rearranging, we have 1272

$$1219 \langle A^T(\mu^{r+1} - \mu^r), x^{r+1} - x^r \rangle \leq -\langle \nabla f(x^{r+1}) - \nabla f(x^r) + \beta B^T B w^r, x^{r+1} - x^r \rangle. \quad (37)$$

1220 Let us bound the lhs and the rhs of (37) separately. 1273

1221 First the lhs of (37) can be expressed as 1274

$$1222 \begin{aligned} \langle A^T(\mu^{r+1} - \mu^r), x^{r+1} - x^r \rangle &= \langle \beta A^T A x^{r+1}, x^{r+1} - x^r \rangle \\ &= \langle \beta A x^{r+1}, A x^{r+1} - A x^r \rangle \\ &= \beta \|A x^{r+1}\|^2 - \beta \langle A x^{r+1}, A x^r \rangle \\ &= \frac{\beta}{2} (\|A x^{r+1}\|^2 - \|A x^r\|^2 + \|A(x^{r+1} - x^r)\|^2). \end{aligned} \quad (38)$$

1223 Second we have the following bound for the rhs of (37) 1275

$$1224 \begin{aligned} &-\langle \nabla f(x^{r+1}) - \nabla f(x^r) + \beta B^T B w^r, x^{r+1} - x^r \rangle \\ &\leq L \|x^{r+1} - x^r\|^2 - \beta \langle B^T B w^r, x^{r+1} - x^r \rangle \\ &= L \|x^{r+1} - x^r\|^2 + \frac{\beta}{2} \left( \|x^r - x^{r-1}\|_{B^T B}^2 - \|x^{r+1} - x^r\|_{B^T B}^2 - \|w^r\|_{B^T B}^2 \right). \end{aligned} \quad (39)$$

1225 Combining the above two bounds, we have 1276

$$1226 \begin{aligned} \frac{\beta}{2} (\|A x^{r+1}\|^2 + \|x^{r+1} - x^r\|_{B^T B}^2) &\leq L \|x^{r+1} - x^r\|^2 + \frac{\beta}{2} (\|x^r - x^{r-1}\|_{B^T B}^2 + \|A x^r\|^2) \\ &\quad - \frac{\beta}{2} (\|w^r\|_{B^T B}^2 + \|A(x^{r+1} - x^r)\|^2). \end{aligned} \quad (39)$$

1227 The desired claim is proved. 1277

**Q.E.D.**

1228 **8.6. Proof of Lemma 4** 1278

1229 Multiplying both sides of (10) by the constant  $c$  and then add them to (9), we obtain 1279

$$1230 \begin{aligned} &L_\beta(x^{r+1}, \mu^{r+1}) + \frac{c\beta}{2} (\|A x^{r+1}\|^2 + \|x^{r+1} - x^r\|_{B^T B}^2) \\ &\leq L_\beta(x^r, \mu^r) + cL \|x^{r+1} - x^r\|^2 + \frac{c\beta}{2} (\|x^r - x^{r-1}\|_{B^T B}^2 + \|A x^r\|^2) \\ &\quad - \left( \frac{\beta - L}{2} - \frac{2L^2}{\beta \sigma_{\min}} \right) \|x^{r+1} - x^r\|^2 + \frac{2\beta}{\sigma_{\min}} \|B^T B w^r\|^2 \\ &\quad - \frac{c\beta}{2} (\|w^r\|_{B^T B}^2 + \|A(x^{r+1} - x^r)\|^2) \\ &\leq L_\beta(x^r, \mu^r) + \frac{c\beta}{2} (\|x^r - x^{r-1}\|_{B^T B}^2 + \|A x^r\|^2) \\ &\quad - \left( \frac{\beta - L}{2} - \frac{2L^2}{\beta \sigma_{\min}} - cL \right) \|x^{r+1} - x^r\|^2 - \left( \frac{c\beta}{2} - \frac{2\beta \|B^T B\|_F}{\sigma_{\min}} \right) \|w^r\|_{B^T B}^2. \end{aligned}$$

1231 1280

1320 The desired result is proved. Q.E.D.

1321

1322 **8.7. Proof of Lemma 5**

1323

1324 To prove this we need to utilize the boundedness assumption in [A2].

1325 First, we can express the augmented Lagrangian function as following

1326

$$L_\beta(x^{r+1}, \mu^{r+1}) = f(x^{r+1}) + \langle \mu^{r+1}, Ax^{r+1} \rangle + \frac{\beta}{2} \|Ax^{r+1}\|^2$$

1327

$$= f(x^{r+1}) + \frac{1}{\beta} \langle \mu^{r+1}, \mu^{r+1} - \mu^r \rangle + \frac{\beta}{2} \|Ax^{r+1}\|^2$$

1328

$$= f(x^{r+1}) + \frac{1}{2\beta} (\|\mu^{r+1}\|^2 - \|\mu^r\|^2 + \|\mu^{r+1} - \mu^r\|^2) + \frac{\beta}{2} \|Ax^{r+1}\|^2.$$

1329

1330 Therefore, summing over  $r = 1 \dots, T$ , we obtain

1331

$$\sum_{r=1}^T L_\beta(x^{r+1}, \mu^{r+1}) = \sum_{r=1}^T \left( f(x^{r+1}) + \frac{\beta}{2} \|Ax^{r+1}\|^2 + \frac{1}{2\beta} \|\mu^{r+1} - \mu^r\|^2 \right) + \frac{1}{2\beta} (\|\mu^{T+1}\|^2 - \|\mu^1\|^2).$$

1332

1333 Suppose Assumption [A2] is satisfied and  $\beta$  is chosen according to (13) and (14), then clearly the above sum is lower bounded since

1334

$$f(x) + \frac{\beta}{2} \|Ax\|^2 \geq f(x) + \frac{\delta}{2} \|Ax\|^2 \geq 0, \quad \forall x \in \mathbb{R}^Q.$$

1335

1336 This fact implies that the sum of the potential function is also lower bounded (note, the remaining terms in the potential function are all nonnegative), that is

1337

$$\sum_{r=1}^T P_{c,\beta}(x^{r+1}, x^r, \mu^{r+1}) > -\infty, \quad \forall T > 0.$$

1338

1339 Note that if  $c$  and  $\beta$  are chosen according to (13) and (14), then  $P_{c,\beta}(x^{r+1}, x^r, \mu^{r+1})$  is nonincreasing. Combined with the lower boundedness of the sum of the potential function, we can conclude that the following is true

1340

$$P_{c,\beta}(x^{r+1}, x^r, \mu^{r+1}) > -\infty, \quad \forall r > 0. \tag{40}$$

1341

1342 This completes the proof. Q.E.D.

1343

1344 **8.8. Proof of Theorem 1**

1345

1346 First we prove part (1). Combining Lemmas 4 and 5, we conclude that  $\|x^{r+1} - x^r\|^2 \rightarrow 0$ . Then according to (8), in the limit we have  $\mu^{r+1} \rightarrow \mu^r$ , or equivalently  $Ax^r \rightarrow 0$ . That is, the constraint violation will be satisfied in the limit.

1347

1348 Then we prove part (2). From the optimality condition of  $x$ -update step (7a) we have

1349

$$\nabla f(x^{r+1}) + A^T \mu^r + \beta A^T (Ax^{r+1}) + \beta B^T B (x^{r+1} - x^r) = 0.$$

1350

1351 Then we argue that  $\{\mu^r\}$  is a bounded sequence if  $\nabla f(x^{r+1})$  is bounded. Indeed the fact that  $\|x^{r+1} - x^r\|^2 \rightarrow 0$  and  $Ax^{r+1} \rightarrow 0$  imply that both  $(x^{r+1} - x^r)$  and  $Ax^{r+1}$  are bounded. Then the boundedness of  $\mu^r$  follows from the assumption that  $\nabla f(x)$  is bounded for any  $x \in \mathbb{R}^Q$ , and that  $\mu^r$  lies in the column space of  $A$ .

1352

1353 Then we argue that  $\{x^r\}$  is bounded if  $f(x) + \frac{\beta}{2} \|Ax\|^2$  is coercive. Note that the potential function can be expressed as

1354

$$P_{c,\beta}(x^{r+1}, x^r, \mu^{r+1}) = f(x^{r+1}) + \langle \mu^{r+1}, Ax^{r+1} \rangle + \frac{\beta}{2} \|Ax^{r+1}\|^2 + \frac{c\beta}{2} (\|Ax^{r+1}\|^2 + \|x^{r+1} - x^r\|_{B^T B}^2)$$

1355

$$= f(x^{r+1}) + \frac{1}{2\beta} (\|\mu^{r+1}\|^2 - \|\mu^r\|^2 + \|\mu^{r+1} - \mu^r\|^2) + \frac{\beta}{2} \|Ax^{r+1}\|^2$$

1356

$$+ \frac{c\beta}{2} (\|Ax^{r+1}\|^2 + \|x^{r+1} - x^r\|_{B^T B}^2)$$

1357

1358

1359

1360

1361

1362

1363

1364

1365

1366

1367

1368

1369

1370

1371

1372

1373

1374

1375

1376

1377

1378

1379

1380

1381

1382

1383

1384

1385

1386

1387

1388

1389

1390

1391

1392

1393

1394

1395

1396

1397

1398

1399

1400

1401

1402

1403

1404

1405

1406

1407

1408

1409

1410

1411

1412

1413

1414

1415

1416

1417

1418

1419

1420

1421

1422

1423

1424

1425

1426

1427

1428

1429

1430 and by our analysis in Lemma 5 we know that it is decreasing thus *upper bounded*. Suppose that  $\{x^r\}$  is 1485  
 1431 unbounded and let  $\mathcal{K}$  denote an infinite subset of iteration index in which  $\lim_{r \in \mathcal{K}} x^r = \infty$ . Passing limit to 1486  
 1432  $P_{c,\beta}(x^{r+1}, x^r, \mu^{r+1})$  over  $\mathcal{K}$ , and using the fact that  $x^{r+1} \rightarrow x^r$ ,  $\mu^{r+1} \rightarrow \mu^r$ , we have 1487  
 1433 1488

$$1434 \lim_{r \in \mathcal{K}} P_{c,\beta}(x^{r+1}, x^r, \mu^{r+1}) = \lim_{r \in \mathcal{K}} f(x^{r+1}) + \frac{c\beta + \beta}{2} \|Ax^{r+1}\| = \infty \quad 1489$$

1436 where the last equality comes from the coerciveness assumption. This is a contradiction to the fact that the 1491  
 1437 potential function  $P_{c,\beta}(x^{r+1}, x^r, \mu^{r+1})$  is upper bounded. This concludes the proof for the second part of the 1492  
 1438 result. 1493  
 1439 1494

1440 Then we prove part (3). Let  $\mathcal{K}$  denote any converging infinite iteration index such that  $\{(\mu^r, x^r)\}_{r \in \mathcal{K}}$  converges 1495  
 1441 to the limit point  $(\mu^*, x^*)$ . Passing limit in  $\mathcal{K}$ , and using the fact that  $\|x^{r+1} - x^r\| \rightarrow 0$ , we have 1496  
 1442 1497

$$1443 \nabla f(x^*) + A^T \mu^* + \beta A^T A x^* = 0. \quad 1498$$

1444 Combined with the fact that  $Ax^* = 0$ , we conclude that  $(\mu^*, x^*)$  is indeed a stationary point of the original 1500  
 1445 problem (5), satisfying (16). 1501  
 1446 1502

1447 Additionally, even if the sequence  $\{x^{r+1}, \mu^{r+1}\}$  does not have a limit point, from part (1) we still have  $\|\mu^{r+1} -$  1503  
 1448  $\mu^r\| \rightarrow 0$  and  $\|x^r - x^{r+1}\| \rightarrow 0$ . Hence 1504  
 1449 1505

$$1450 \lim_{r \rightarrow \infty} \nabla_x L_\beta(x^{r+1}, \mu^r) = \lim_{r \rightarrow \infty} \nabla f(x^{r+1}) \stackrel{(i)}{=} \lim_{r \rightarrow \infty} -\beta B^T B(x^{r+1} - x^r) = 0 \quad 1506$$

1451 where (i) is from the optimality condition of the  $x$ -subproblem (7a). Therefore we have  $Q(x^{r+1}, \mu^r) \rightarrow 0$ . 1507  
 1452 1508  
 1453 1509

1454 Finally we prove part (4). Our first step is to bound the size of the gradient of the augmented Lagrangian. From 1510  
 1455 the optimality condition of the  $x$ -problem (7a), we have 1511  
 1456 1512

$$1457 \begin{aligned} 1458 \|\nabla_x L_\beta(x^r, \mu^{r-1})\|^2 &= \|\nabla_x L_\beta(x^{r+1}, \mu^r) + \beta B^T B(x^{r+1} - x^r) - \nabla_x L_\beta(x^r, \mu^{r-1})\|^2 & 1513 \\ 1459 &= \|\nabla f(x^{r+1}) - \nabla f(x^r) + A^T(\mu^{r+1} - \mu^r) + \beta B^T B(x^{r+1} - x^r)\|^2 & 1514 \\ 1460 &\leq 3L^2 \|x^{r+1} - x^r\|^2 + 3\|\mu^{r+1} - \mu^r\|^2 \|A^T A\| + 3\beta^2 \|B^T B(x^{r+1} - x^r)\|^2. & 1515 \\ 1461 & & 1516 \end{aligned}$$

1462 By utilizing the estimate (8), we see that there must exist a constant  $\xi > 0$  such that the following is true 1517  
 1463 1518  
 1464 1519

$$1465 Q(x^r, \mu^{r-1}) = \|\nabla_x L_\beta(x^r, \mu^{r-1})\|^2 + \beta \|Ax^r\|^2 \leq \xi \|x^r - x^{r+1}\|^2 + \xi \|B^T B w^r\|^2. \quad 1520$$

1466 From the descent estimate (9) we see that there must exist a constant  $\nu > 0$  such that 1521  
 1467 1522  
 1468 1523

$$1469 P_{c,\beta}(x^{r+1}, x^r, \mu^{r+1}) - P_{c,\beta}(x^r, x^{r-1}, \mu^r) \leq -\nu \|x^{r+1} - x^r\|^2 - \nu \|B^T B w^r\|^2. \quad 1524$$

1470 Matching the above two bounds, we have 1525  
 1471 1526  
 1472 1527

$$1473 Q(x^r, \mu^{r-1}) \leq \frac{\nu}{\xi} (P_{c,\beta}(x^r, x^{r-1}, \mu^r) - P_{c,\beta}(x^{r+1}, x^r, \mu^{r+1})). \quad 1528$$

1474 Summing over  $r$ , and let  $T$  denote the first time that  $Q(x^r, \mu^{r-1})$  reaches below  $\varphi$ , we obtain 1529  
 1475 1530  
 1476 1531  
 1477 1532

$$1478 \begin{aligned} 1479 \varphi &\leq \frac{1}{T-1} \sum_{r=1}^{T-1} Q(x^r, \mu^{r-1}) \leq \frac{1}{T-1} \frac{\nu}{\xi} (P_{c,\beta}(x^1, x^0, \mu^1) - P_{c,\beta}(x^T, x^{T-1}, \mu^T)) & 1533 \\ 1480 &\leq \frac{1}{T-1} \frac{\nu}{\xi} (P_{c,\beta}(x^1, x^0, \mu^1) - \underline{P}) := \frac{\nu}{T-1}. & 1534 \\ 1481 & & 1535 \\ 1482 & & 1536 \end{aligned}$$

1483 We conclude that the convergence in term of the optimality gap function  $Q(x^{r+1}, \mu^r)$  is sublinear. 1537  
 1484 1538

**Q.E.D.**

1485  
1486  
1487  
1488  
1489  
1490  
1491  
1492  
1493  
1494  
1495  
1496  
1497  
1498  
1499  
1500  
1501  
1502  
1503  
1504  
1505  
1506  
1507  
1508  
1509  
1510  
1511  
1512  
1513  
1514  
1515  
1516  
1517  
1518  
1519  
1520  
1521  
1522  
1523  
1524  
1525  
1526  
1527  
1528  
1529  
1530  
1531  
1532  
1533  
1534  
1535  
1536  
1537  
1538  
1539

1540 **8.9. The Analysis Outline for Prox-GPDA** 1595

1541 First, following the derivation leading to (8) we obtain 1596  
 1542 1597

$$1543 \frac{1}{\beta} \|\mu^{r+1} - \mu^r\|^2 \leq \frac{2L^2}{\beta\sigma_{\min}} \|x^r - x^{r-1}\|^2 + \frac{2\beta}{\sigma_{\min}} \|B^T B w^r\|^2. \quad (41)$$

1544 1598  
 1545 1599  
 1546 1600

1546 Note that the first term is now related to the square of the difference between the *previous* two iterations. 1601

1547 Following the proof steps in Lemma 2, the descent of the augmented Lagrangian is given by 1602  
 1548 1603

$$1549 L_\beta(x^{r+1}, \mu^{r+1}) - L_\beta(x^r, \mu^r) \quad 1604$$

$$1550 \leq -\frac{\beta - L}{2} \|x^{r+1} - x^r\|^2 + \frac{2\beta}{\sigma_{\min}} \|B^T B w^r\|^2 + \frac{2L^2}{\beta\sigma_{\min}} \|x^r - x^{r-1}\|^2. \quad (42)$$

1551 1605  
 1552 1606  
 1553 1607  
 1554 1608

1554 In the third step we have the following estimate 1609  
 1555 1610

$$1556 \frac{\beta}{2} (\|Ax^{r+1}\|^2 + \|x^{r+1} - x^r\|_{B^T B}^2) \quad 1611$$

$$1557 \leq \frac{L}{2} \|x^{r-1} - x^r\|^2 + \frac{L}{2} \|x^{r+1} - x^r\|^2 + \frac{\beta}{2} (\|x^r - x^{r-1}\|_{B^T B}^2 + \|Ax^r\|^2) \quad 1612$$

$$1558 - \frac{\beta}{2} (\|w^r\|_{B^T B}^2 + \|A(x^{r+1} - x^r)\|^2). \quad (43)$$

1559 1613  
 1560 1614  
 1561 1615  
 1562 1616  
 1563 1617

1563 Note that the first two terms come from the following estimate 1618  
 1564 1619

$$1565 -\langle x^{r+1} - x^r, \nabla f(x^r) - \nabla f(x^{r-1}) \rangle \leq \frac{L}{2} \|x^{r+1} - x^r\|^2 + \frac{1}{2L} \|\nabla f(x^r) - \nabla f(x^{r-1})\|^2 \quad 1620$$

$$1566 \leq \frac{L}{2} \|x^{r+1} - x^r\|^2 + \frac{L}{2} \|x^r - x^{r-1}\|^2, \quad 1621$$

1567 1622  
 1568 1623

1569 where the first inequality is the application of Young's inequality. 1624

1570 In the fourth step we have the following overall descent estimate 1625  
 1571 1626  
 1572 1627

$$1573 L_\beta(x^{r+1}, \mu^{r+1}) + \frac{c\beta}{2} (\|Ax^{r+1}\|^2 + \|x^{r+1} - x^r\|_{B^T B}^2) \quad 1628$$

$$1574 \leq L_\beta(x^r, \mu^r) + \frac{c\beta}{2} (\|x^r - x^{r-1}\|_{B^T B}^2 + \|Ax^r\|^2) - \left( \frac{\beta - L}{2} - \frac{cL}{2} \right) \|x^{r+1} - x^r\|^2 \quad 1629$$

$$1575 + \left( \frac{2L^2}{\beta\sigma_{\min}} + \frac{cL}{2} \right) \|x^{r-1} - x^r\|^2 - \left( \frac{c\beta}{2} - \frac{2\beta\|B^T B\|}{\sigma_{\min}} \right) \|w^r\|_{B^T B}^2. \quad (44)$$

1576 1630  
 1577 1631  
 1578 1632  
 1579 1633  
 1580 1634

1580 Note that there is a slight difference between this descent estimate and our previous estimate (12), because now 1635  
 1581 there is a positive term in the rhs, which involves  $\|x^r - x^{r-1}\|^2$ . Therefore the potential function is difficult to 1636  
 1582 decrease by itself. Fortunately, such extra term can be bounded by the descent of the *previous* iteration. We can 1637  
 1583 take the summation over all the iterations and obtain 1638

$$1584 L_\beta(x^{T+1}, \mu^{T+1}) + \frac{c\beta}{2} (\|Ax^{T+1}\|^2 + \|x^{T+1} - x^T\|_{B^T B}^2) \quad 1639$$

$$1585 \leq L_\beta(x^1, \mu^1) + \frac{c\beta}{2} (\|x^1 - x^0\|_{B^T B}^2 + \|Ax^1\|^2) + \left( \frac{2L^2}{\beta\sigma_{\min}} + cL \right) \|x^0 - x^1\|^2 \quad 1640$$

$$1586 - \sum_{r=1}^{T-1} \left( \frac{\beta - L}{2} - \frac{2L^2}{\beta\sigma_{\min}} - cL \right) \|x^{r+1} - x^r\|^2 - \sum_{r=1}^T \left( \frac{c\beta}{2} - \frac{2\beta\|B^T B\|}{\sigma_{\min}} \right) \|w^r\|_{B^T B}^2. \quad 1641$$

1587 1642  
 1588 1643  
 1589 1644  
 1590 1645  
 1591 1646

1592 Clearly as long as the potential function is lower bounded, we have  $x^{r+1} \rightarrow x^r$  and  $x^{r+1} - x^r \rightarrow x^r - x^{r-1}$ . The 1647  
 1593 rest of the proof follows similar steps leading to Theorem 1, hence is omitted. 1648  
 1594 1649

## 9. Proof of Convergence for Prox-PDA-IP

In this part we present the convergence analysis for Prox-PDA-IP algorithm which main steps are given in (19) and (20). Our analysis consists of a series of steps.

**Step 1.** Our first step is again to bound the size of the successive difference of  $\{\mu^r\}$ . To this end, write down the optimality condition for the  $x$ -update (19) as

$$A^T \mu^{r+1} = -\nabla f(x^{r+1}) - \beta^{r+1} B^T B(x^{r+1} - x^r). \quad (45)$$

Subtracting the previous iteration, we obtain

$$A^T (\mu^{r+1} - \mu^r) = -(\nabla f(x^{r+1}) - \nabla f(x^r)) - \beta^r B^T B(w^r) - (\beta^{r+1} - \beta^r) B^T B(x^{r+1} - x^r). \quad (46)$$

Therefore, using the fact that  $\mu^{r+1} - \mu^r \in \text{col}(A)$ , we have

$$\frac{1}{\beta^{r+1}} \|\mu^{r+1} - \mu^r\|^2 \leq \frac{3}{\beta^{r+1} \sigma_{\min}} (L^2 + (\beta^{r+1} - \beta^r)^2 \|B^T B\|) \|x^{r+1} - x^r\|^2 + \frac{3(\beta^r)^2}{\beta^{r+1} \sigma_{\min}} \|B^T B(w^r)\|^2. \quad (47)$$

Also from the optimality condition we have the following relation

$$x^{r+1} = x^r - \frac{1}{\beta^{r+1}} (B^T B)^{-1} (\nabla f(x^{r+1}) + A^T \mu^{r+1}) := x^r - \frac{1}{\beta^{r+1}} v^{r+1}, \quad (48)$$

where we have defined the primal update direction  $v^{r+1}$  as

$$v^{r+1} = (B^T B)^{-1} (\nabla f(x^{r+1}) + A^T \mu^{r+1}).$$

**Step 2.** In the second step we analyze the descent of the augmented Lagrangian. We have the following estimate

$$\begin{aligned} & L_{\beta^{r+1}}(x^{r+1}, \mu^{r+1}) - L_{\beta^r}(x^r, \mu^r) \\ &= L_{\beta^{r+1}}(x^{r+1}, \mu^{r+1}) - L_{\beta^{r+1}}(x^{r+1}, \mu^r) + L_{\beta^{r+1}}(x^{r+1}, \mu^r) - L_{\beta^{r+1}}(x^r, \mu^r) + L_{\beta^{r+1}}(x^r, \mu^r) - L_{\beta^r}(x^r, \mu^r) \\ &\stackrel{(i)}{\leq} \frac{1}{\beta^{r+1}} \|\mu^{r+1} - \mu^r\|^2 + \frac{\beta^{r+1} - \beta^r}{2(\beta^r)^2} \|\mu^r - \mu^{r-1}\|^2 - \frac{\beta^{r+1} - L}{2} \|x^{r+1} - x^r\|^2 \\ &\stackrel{(ii)}{\leq} - \left( \frac{\beta^{r+1} - L}{2} - \frac{3}{\beta^{r+1} \sigma_{\min}} (L^2 + (\beta^{r+1} - \beta^r)^2 \|B^T B\|) \right) \|x^{r+1} - x^r\|^2 + \frac{\beta^{r+1} - \beta^r}{2(\beta^r)^2} \|\mu^r - \mu^{r-1}\|^2 \\ &\quad + \frac{3(\beta^r)^2}{\beta^{r+1} \sigma_{\min}} \|B^T B(w^r)\|^2 \end{aligned} \quad (49)$$

where in (i) we have used the optimality of the  $x$ -subproblem (cf. the derivation in (35)), and the fact that

$$L_{\beta^{r+1}}(x^r, \mu^r) - L_{\beta^r}(x^r, \mu^r) = \frac{\beta^{r+1} - \beta^r}{2} \|Ax^r\|^2 = \frac{\beta^{r+1} - \beta^r}{2(\beta^r)^2} \|\mu^r - \mu^{r-1}\|^2; \quad (50)$$

in (ii) we have applied (47).

**Step 3.** In the third step, we construct the remaining part of the potential function. We have the following two inequalities from the optimality condition of the  $x$ -update (19)

$$\begin{aligned} \langle \nabla f(x^{r+1}) + A^T \mu^{r+1} + \beta^{r+1} B^T B(x^{r+1} - x^r), x^{r+1} - x \rangle &\leq 0, \quad \forall x \in \mathbb{R}^Q \\ \langle \nabla f(x^r) + A^T \mu^r + \beta^r B^T B(x^r - x^{r-1}), x^r - x \rangle &\leq 0, \quad \forall x \in \mathbb{R}^Q. \end{aligned}$$

Plugging  $x = x^r$  and  $x = x^{r+1}$  to these two equations and adding them together, we obtain

$$\begin{aligned} & \langle A^T (\mu^{r+1} - \mu^r), x^{r+1} - x^r \rangle \\ & \leq -\langle \nabla f(x^{r+1}) - \nabla f(x^r), x^{r+1} - x^r \rangle - \langle B^T B(\beta^{r+1}(x^{r+1} - x^r) - \beta^r(x^r - x^{r-1})), x^{r+1} - x^r \rangle. \end{aligned}$$

The lhs of the above inequality can be expressed as

$$\begin{aligned} & \langle A^T(\mu^{r+1} - \mu^r), x^{r+1} - x^r \rangle \\ &= \frac{\beta^{r+1}}{2} (\|Ax^{r+1}\|^2 - \|Ax^r\|^2 + \|A(x^{r+1} - x^r)\|^2) \\ &= \frac{\beta^{r+1}}{2} \|Ax^{r+1}\|^2 - \frac{\beta^r}{2} \|Ax^r\|^2 + \frac{\beta^{r+1}}{2} \|A(x^{r+1} - x^r)\|^2 + \frac{\beta^r - \beta^{r+1}}{2} \|Ax^r\|^2, \end{aligned}$$

while its rhs can be bounded as

$$\begin{aligned} & - \langle \nabla f(x^{r+1}) - \nabla f(x^r), x^{r+1} - x^r \rangle - \langle B^T B(\beta^{r+1}(x^{r+1} - x^r) - \beta^r(x^r - x^{r-1})), x^{r+1} - x^r \rangle \\ & \leq L\|x^{r+1} - x^r\|^2 - (\beta^{r+1} - \beta^r)\|x^{r+1} - x^r\|_{B^T B}^2 \\ & \quad + \frac{\beta^r}{2} (\|x^r - x^{r-1}\|_{B^T B}^2 - \|x^r - x^{r+1}\|_{B^T B}^2 - \|w^r\|_{B^T B}^2) \\ & = L\|x^{r+1} - x^r\|^2 - \frac{\beta^{r+1} - \beta^r}{2} \|x^{r+1} - x^r\|_{B^T B}^2 \\ & \quad + \frac{\beta^r}{2} \|x^r - x^{r-1}\|_{B^T B}^2 - \frac{\beta^{r+1}}{2} \|x^r - x^{r+1}\|_{B^T B}^2 - \frac{\beta^r}{2} \|w^r\|_{B^T B}^2 \\ & \stackrel{(21)}{\leq} L\|x^{r+1} - x^r\|^2 + \frac{\beta^r}{2} \|x^r - x^{r-1}\|_{B^T B}^2 - \frac{\beta^{r+1}}{2} \|x^r - x^{r+1}\|_{B^T B}^2 - \frac{\beta^r}{2} \|w^r\|_{B^T B}^2. \end{aligned}$$

Therefore, combining the above three inequalities we obtain

$$\begin{aligned} & \frac{\beta^{r+1}}{2} \|Ax^{r+1}\|^2 + \frac{\beta^{r+1}}{2} \|x^r - x^{r+1}\|_{B^T B}^2 \\ & \leq \frac{\beta^r}{2} \|Ax^r\|^2 + \frac{\beta^r}{2} \|x^r - x^{r-1}\|_{B^T B}^2 + \frac{\beta^{r+1} - \beta^r}{2(\beta^r)^2} \|\mu^{r-1} - \mu^r\|^2 + L\|x^{r+1} - x^r\|^2 - \frac{\beta^r}{2} \|w^r\|_{B^T B}^2. \end{aligned}$$

Multiplying both sides by  $\beta^r$ , we obtain

$$\begin{aligned} & \frac{\beta^{r+1}\beta^r}{2} \|Ax^{r+1}\|^2 + \frac{\beta^{r+1}\beta^r}{2} \|x^r - x^{r+1}\|_{B^T B}^2 \\ & \leq \frac{\beta^r\beta^{r-1}}{2} \|Ax^r\|^2 + \frac{\beta^r\beta^{r-1}}{2} \|x^r - x^{r-1}\|_{B^T B}^2 + \frac{\beta^{r+1} - \beta^r}{2\beta^r} \|\mu^{r-1} - \mu^r\|^2 + \beta^r L\|x^{r+1} - x^r\|^2 \\ & \quad - \frac{(\beta^r)^2}{2} \|w^r\|_{B^T B}^2 + \frac{\beta^r(\beta^r - \beta^{r-1})}{2} \|Ax^r\|^2 + \frac{\beta^r(\beta^r - \beta^{r-1})}{2} \|x^r - x^{r-1}\|_{B^T B}^2 \\ & = \frac{\beta^r\beta^{r-1}}{2} \|Ax^r\|^2 + \frac{\beta^r\beta^{r-1}}{2} \|x^r - x^{r-1}\|_{B^T B}^2 + \frac{\beta^{r+1} - \beta^{r-1}}{2\beta^r} \|\mu^{r-1} - \mu^r\|^2 + \beta^r L\|x^{r+1} - x^r\|^2 \\ & \quad - \frac{(\beta^r)^2}{2} \|w^r\|_{B^T B}^2 + \frac{\beta^r(\beta^r - \beta^{r-1})}{2} \|x^r - x^{r-1}\|_{B^T B}^2 \end{aligned} \tag{51}$$

where in the last equality we have merged the terms  $\frac{\beta^{r+1}-\beta^r}{2\beta^r} \|\mu^{r-1} - \mu^r\|^2$  and  $\frac{\beta^r(\beta^r - \beta^{r-1})}{2} \|Ax^r\|^2$ .

**Step 4.** In this step we construct and estimate the descent of the potential function. For some given  $c > 0$ , let us define the potential function as

$$P_{\beta^{r+1}, c}(x^{r+1}, x^r, \mu^{r+1}) = L_{\beta^{r+1}}(x^{r+1}, \mu^{r+1}) + \frac{c\beta^{r+1}\beta^r}{2} \|Ax^{r+1}\|^2 + \frac{c\beta^{r+1}\beta^r}{2} \|x^r - x^{r+1}\|_{B^T B}^2.$$

Note that this potential function has some major differences compared with the one we used before; cf. (11). In particular, the second and the third terms are now quadratic, rather than linear, in the penalty parameters. This new construction is the key to our following analysis.

1870 Then combining the estimate in (51) and (49), we obtain

$$\begin{aligned}
 & P_{\beta^{r+1},c}(x^{r+1}, x^r, \mu^{r+1}) - P_{\beta^r,c}(x^r, x^{r-1}, \mu^r) \\
 & \leq - \left( \frac{\beta^{r+1} - L}{2} - \frac{3}{\beta^{r+1}\sigma_{\min}} (L^2 + (\beta^{r+1} - \beta^r)^2 \|B^T B\|) - c\beta^r L \right) \|x^{r+1} - x^r\|^2 \\
 & \quad + \frac{\beta^{r+1} - \beta^{r-1}}{2\beta^r} \left( \frac{1}{\beta^r} + c \right) \|\mu^r - \mu^{r-1}\|^2 + \frac{c\beta^r(\beta^r - \beta^{r-1})}{2} \|x^r - x^{r-1}\|_{B^T B}^2 \\
 & \quad - \left( \frac{c(\beta^r)^2}{2} - \frac{3(\beta^r)^2 \|B^T B\|}{\beta^{r+1}\sigma_{\min}} \right) \|w^r\|_{B^T B}^2
 \end{aligned} \tag{52}$$

1880 where in the inequality we have also used the fact that  $\beta^r \geq \beta^{r-1}$ .

1882 Taking the sum of  $r$  from  $t$  to  $T$  (for some  $T > t > 1$ ) and utilize again the estimate in (47), we have

$$\begin{aligned}
 & P_{\beta^{T+1},c}(x^{T+1}, x^T, \mu^{T+1}) - P_{\beta^t,c}(x^t, x^{t-1}, \mu^t) \\
 & \leq \sum_{r=t}^T - \left( \frac{\beta^{r+1} - L}{2} - \frac{3 + 3(1/\beta^r + c)(\beta^{r+1} - \beta^{r-1})/2\beta^r}{\beta^{r+1}\sigma_{\min}} (L^2 + (\beta^{r+1} - \beta^{r-1})^2 \|B^T B\|) \right. \\
 & \quad \left. - c\beta^r L - \frac{c\beta^{r+1}(\beta^{r+1} - \beta^r) \|B^T B\|}{2} \right) \|x^{r+1} - x^r\|^2 \\
 & \quad - \left( \frac{c(\beta^r)^2}{2} - \frac{(3 + 3(1/\beta^r + c)(\beta^{r+1} - \beta^{r-1})/2\beta^r)(\beta^r)^2 \|B^T B\|}{\beta^{r+1}\sigma_{\min}} \right) \|w^r\|_{B^T B}^2 \\
 & \quad + \frac{c\beta^t(\beta^t - \beta^{t-1})}{2} \|x^t - x^{t-1}\|_{B^T B}^2 + \frac{\beta^{t+1} - \beta^{t-1}}{2\beta^t} (1/\beta^t + c) \|\mu^t - \mu^{t-1}\|^2.
 \end{aligned} \tag{53}$$

1896 First, note that for any  $c \in (0, 1)$ , the coefficient in front of  $\|w^r\|_{B^T B}^2$  becomes negative for sufficiently large  
 1897 (but finite)  $t$ . This is because  $\{\beta^r\} \rightarrow \infty$ , and that the first term in the parenthesis scales in  $\mathcal{O}((\beta^r)^2)$  while the  
 1898 second term scales in  $\mathcal{O}(\beta^r)$ . For the first term to be negative, we need  $c > 0$  to be *small enough* such that the  
 1899 following is true for large enough  $r$

$$\frac{\beta^{r+1} - L}{2} - c\beta^r L - \frac{c\beta^{r+1}(\beta^{r+1} - \beta^r) \|B^T B\|}{2} > \frac{\beta^{r+1}}{24}.$$

1903 Suppose that  $r$  is large enough such that  $(\beta^{r+1} - L)/2 > \beta^{r+1}/3$ , or equivalently  $\beta^{r+1} > 3L$ . Also choose  
 1904  $c = \min\{1/(4L), 1/(12\kappa\|B^T B\|)\}$ , where  $\kappa$  is given in (21). Then we have

$$\frac{\beta^{r+1} - L}{2} - c\beta^r L - \frac{c\beta^{r+1}(\beta^{r+1} - \beta^r) \|B^T B\|}{2} > \frac{\beta^{r+1}}{3} - \frac{\beta^{r+1}}{4} - \frac{\beta^{r+1}}{24} = \frac{\beta^{r+1}}{24}. \tag{54}$$

1909 For this given  $c$ , we can also show that the following is true for sufficiently large  $r$

$$\begin{aligned}
 & \frac{3 + 3(1/\beta^r + c)(\beta^{r+1} - \beta^{r-1})/2\beta^r}{\beta^{r+1}\sigma_{\min}} (L^2 + (\beta^{r+1} - \beta^r)^2 \|B^T B\|) \leq \frac{\beta^{r+1}}{48} \\
 & \left( \frac{c(\beta^r)^2}{2} - \frac{(3 + 3(1/\beta^r + c)(\beta^{r+1} - \beta^{r-1})/2\beta^r)(\beta^r)^2 \|B^T B\|}{\beta^{r+1}\sigma_{\min}} \right) \geq \frac{c(\beta^r)^2}{48}.
 \end{aligned}$$

1916 In conclusion we have that for sufficiently large but finite  $t_0$ , we have

$$\begin{aligned}
 & P_{\beta^{T+1},c}(x^{T+1}, x^T, \mu^{T+1}) - P_{\beta^{t_0},c}(x^{t_0-1}, x^{t_0}, \mu^{t_0}) \\
 & \leq \sum_{r=t_0}^T \left( -\frac{\beta^{r+1}}{48} \|x^{r+1} - x^r\|^2 - \frac{c(\beta^r)^2}{48} \|w^r\|_{B^T B}^2 \right) \\
 & \quad + \frac{c\beta^{t_0}(\beta^{t_0} - \beta^{t_0-1})}{2} \|x^{t_0} - x^{t_0-1}\|_{B^T B}^2 + \frac{\beta^{t_0+1} - \beta^{t_0-1}}{2\beta^{t_0}} (1/\beta^{t_0} + c) \|\mu^{t_0} - \mu^{t_0-1}\|^2.
 \end{aligned} \tag{55}$$

Therefore we conclude that if  $\{\beta^{r+1}\}$  satisfies (21), and for  $c > 0$  sufficiently small, there exists a finite  $t_0 > 0$  such that for all  $T > t_0$ , the first two terms of the rhs of (53) are negative.

**Step 5.** Next we show that the potential function must be lower bounded. Observe that the augmented Lagrangian is given by

$$\begin{aligned}
 & L_{\beta^{r+1}}(x^{r+1}, \mu^{r+1}) \\
 &= f(x^{r+1}) + \langle \mu^{r+1}, Ax^{r+1} \rangle + \frac{\beta^{r+1}}{2} \|Ax^{r+1}\|^2 \\
 &= f(x^{r+1}) + \frac{1}{2\beta^{r+1}} (\|\mu^{r+1}\|^2 - \|\mu^r\|^2 + \|\mu^{r+1} - \mu^r\|^2) + \frac{\beta^{r+1}}{2} \|Ax^{r+1}\|^2 \\
 &= f(x^{r+1}) + \frac{1}{2\beta^{r+1}} \|\mu^{r+1}\|^2 - \frac{1}{2\beta^r} \|\mu^r\|^2 + \frac{1}{2\beta^{r+1}} \|\mu^{r+1} - \mu^r\|^2 + \left( \frac{1}{2\beta^r} - \frac{1}{2\beta^{r+1}} \right) \|\mu^r\|^2 + \frac{\beta^{r+1}}{2} \|Ax^{r+1}\|^2 \\
 &\geq f(x^{r+1}) + \frac{1}{2\beta^{r+1}} \|\mu^{r+1}\|^2 - \frac{1}{2\beta^r} \|\mu^r\|^2 + \frac{1}{2\beta^{r+1}} \|\mu^{r+1} - \mu^r\|^2 + \frac{\beta^{r+1}}{2} \|Ax^{r+1}\|^2
 \end{aligned}$$

where we have used the fact that  $\beta^{r+1} \geq \beta^r$ . Note that  $t_0$  in (55) is a finite number hence  $\frac{1}{2\beta^{t_0}} \|\mu^{t_0}\|^2$  is finite, and utilize Assumption [A2], we conclude that

$$\sum_{r=t_0}^{\infty} L_{\beta^{r+1}}(x^{r+1}, \mu^{r+1}) > -\infty. \tag{56}$$

By noting that the remaining terms of the potential function are all nonnegative, we have

$$\sum_{r=1}^{\infty} P_{\beta^{r+1}, c}(x^{r+1}, x^r, \mu^{r+1}) > -\infty. \tag{57}$$

Combining (57) and the bound (55) (which is true for a finite  $t_0 > 0$ ), we conclude that the potential function  $P_{\beta^{r+1}, c}(x^{r+1}, x^r, \mu^{r+1})$  is lower bounded for all  $r$ .

**Step 6.** In this step we show that the successive differences of various quantities converge.

The lower boundedness of the potential function combined with the bound (55) (which is true for a finite  $t_0 > 0$ ) implies that

$$\sum_{r=1}^{\infty} \beta^{r+1} \|x^{r+1} - x^r\|^2 < \infty, \tag{58a}$$

$$\sum_{r=1}^{\infty} (\beta^r)^2 \|w^r\|_{B^T B}^2 < \infty. \tag{58b}$$

Therefore, we have

$$\beta^{r+1} \|x^{r+1} - x^r\|^2 \rightarrow 0, \tag{59a}$$

$$(\beta^r)^2 \|w^r\|_{B^T B}^2 \rightarrow 0. \tag{59b}$$

These two facts applied to (46), combined with  $\mu^{r+1} - \mu^r \in \text{col}(A)$ , indicate that the following is true

$$\mu^{r+1} - \mu^r \rightarrow 0. \tag{60}$$

Also (55) implies that the potential function is *upper bounded* as well, and this indicates that

$$\frac{c\beta^{r+1}\beta^r}{2} \|Ax^{r+1}\|^2 \text{ is bounded, } \frac{c\beta^{r+1}\beta^r}{2} \|x^r - x^{r+1}\|^2 \text{ is bounded.} \tag{61}$$

The second of the above inequality implies that  $\beta^{r+1} B^T B(x^{r+1} - x^r)$  is bounded. If we further assume that  $\nabla f(x)$  is bounded, and use (45), we can conclude that  $\{\mu^r\}$  is bounded.



where in the last inequality we have used (66) and the fact that for all  $t \in (r+1, t(r))$ , we have  $\|v^t\| < \epsilon$ . This implies that

$$\frac{3}{8L\|(B^T B)^{-1}\|} \leq \sum_{t=r}^{t(r)-1} \frac{1}{\beta^{t+1}}. \quad (68)$$

Using the descent of the potential function (65) we have, for  $r \in \mathcal{R}$  and  $r$  large enough

$$\begin{aligned} & P_{\beta^{t(r)},c}(x^{t(r)}, x^{t(r)-1}, \mu^{t(r)}) - P_{\beta^r,c}(x^r, x^{r-1}, \mu^r) \\ & \leq - \sum_{t=r}^{t(r)-1} \frac{1}{48\beta^{t+1}} \|v^{t+1}\|^2 + \frac{\epsilon^2}{4096L\|B^T B\|} \\ & \stackrel{(i)}{\leq} - \left(\frac{\epsilon}{4}\right)^2 \sum_{t=r}^{t(r)-1} \frac{1}{48\beta^{t+1}} + \frac{\epsilon^2}{4096L\|B^T B\|} \\ & \stackrel{(ii)}{\leq} - \frac{\epsilon^2}{2048L\|B^T B\|} + \frac{\epsilon^2}{4096L\|B^T B\|} \\ & \leq - \frac{\epsilon^2}{4096L\|B^T B\|} \end{aligned} \quad (69)$$

where in (i) we have used the fact that for all  $r \in \mathcal{R}$ ,  $\|v^{r+i}\| \geq \frac{\epsilon}{2}$  for  $i = 1, \dots, t(r)$ ; in (ii) we have used (68). However we know that the potential function is convergent, i.e.,

$$\lim_{r \rightarrow \infty} P_{\beta^{t(r)},c}(x^{t(r)}, x^{t(r)-1}, \mu^{t(r)}) \rightarrow P_{\beta^r,c}(x^r, x^{r-1}, \mu^r) = 0$$

which contradicts to (69). Therefore we conclude that  $\|v^{r+1}\| \rightarrow 0$ .

Finally, combining  $\|v^{r+1}\| \rightarrow 0$  with the convergence of  $\mu^{r+1} - \mu^r$  (cf. (60)), we conclude that every limit point of  $\{x^r, \mu^r\}$  satisfies

$$\nabla f(x^*) + A^T \mu^* = 0, \quad Ax^* = 0.$$

Therefore it is a stationary solution for problem (5). This completes the proof.

## 10. Proof of Convergence for Algorithm 2

To make the derivation compact, define the following matrix

$$\begin{aligned} M^{r+1} & := \nabla_{\mathbf{X}} f(\mathbf{X}^{r+1}, Y^{r+1}) \\ & = [((X_1^{r+1} y_1^{r+1}) - z_1)(y_1^{r+1})^T + 2\gamma X_1^{r+1}; \dots; ((X_N^{r+1} y_N^{r+1}) - z_N)(y_N^{r+1})^T + 2\gamma X_N^{r+1}]. \end{aligned} \quad (70)$$

The proof consists of six steps.

**Step 1.** First we note that the optimality condition for the  $\mathbf{X}$ -subproblem (30c) is given by

$$\mathbf{A}^T \boldsymbol{\Omega}^{r+1} = -M^{r+1} - \beta \langle B^T B, (\mathbf{X}^{r+1} - \mathbf{X}^r) \rangle. \quad (71)$$

By utilizing the fact that  $\boldsymbol{\Omega}^{r+1} - \boldsymbol{\Omega}^r$  lies in the column space of  $\mathbf{A}$ , and the eigenvalues of  $A^T A$  equal to those of  $\mathbf{A}^T \mathbf{A}$ , we have the following bound

$$\|\boldsymbol{\Omega}^{r+1} - \boldsymbol{\Omega}^r\|_F^2 \leq \frac{2}{\sigma_{\min}} \left( \|M^{r+1} - M^r\|_F^2 + \beta^2 \|B^T B[(\mathbf{X}^{r+1} - \mathbf{X}^r) - (\mathbf{X}^r - \mathbf{X}^{r-1})]\|_F^2 \right).$$

Next let us analyze the first term in the rhs of the above inequality. The following identity holds true

$$\begin{aligned}
 & \|M^{r+1} - M^r\|_F^2 \\
 &= \sum_{i=1}^N \|(X_i^{r+1} y_i^{r+1} - z_i)(y_i^{r+1})^T - (X_i^r y_i^r - z_i)(y_i^r)^T + 2\gamma(X_i^{r+1} - X_i^r)\|_F^2 \\
 &\leq \sum_{i=1}^N 4\|X_i^{r+1} - X_i^r\|_F^2 \|y_i^{r+1} (y_i^{r+1})^T\|^2 + 4\|X_i^r y_i^r - z_i\|^2 \|y_i^{r+1} - y_i^r\|^2 + 4\|X_i^r (y_i^{r+1} - y_i^r)\|^2 \|y_i^{r+1}\|^2 \\
 &\quad + 16\gamma^2 \|X_i^{r+1} - X_i^r\|_F^2 \\
 &\leq \sum_{i=1}^N 4(\tau^2 + 4\gamma^2) \|X_i^{r+1} - X_i^r\|_F^2 + 4\theta_i^r \|y_i^{r+1} - y_i^r\|^2 + 4\tau \|X_i^r (y_i^{r+1} - y_i^r)\|^2
 \end{aligned} \tag{72}$$

where in the last inequality we have defined the constant  $\theta_i^r$  as

$$\theta_i^r := \|X_i^r y_i^r - z_i\|^2. \tag{73}$$

Therefore, combining the above two inequalities, we obtain

$$\begin{aligned}
 \frac{1}{\beta} \|\Omega^{r+1} - \Omega^r\|_F^2 &\leq \frac{8}{\beta \sigma_{\min}} \sum_{i=1}^N ((\tau^2 + 4\gamma^2) \|X_i^{r+1} - X_i^r\|_F^2 + \theta_i^r \|y_i^{r+1} - y_i^r\|^2 + \tau \|X_i^r (y_i^{r+1} - y_i^r)\|^2) \\
 &\quad + \frac{2\beta}{\sigma_{\min}} \|B^T B[(X^{r+1} - X^r) - (X^r - X^{r-1})]\|_F^2
 \end{aligned} \tag{74}$$

**Step 2.** Next let us analyze the descent of the augmented Lagrangian. First we have

$$\begin{aligned}
 & L_\beta(X^r, Y^{r+1}, \Omega^r) - L_\beta(X^r, Y^r, \Omega^r) \\
 &= \sum_{i=1}^N \left( \frac{1}{2} \|X_i^r y_i^{r+1} - z_i\|^2 + h_i(y_i^{r+1}) - \frac{1}{2} \|X_i^r y_i^r - z_i\|^2 - h_i(y_i^r) \right) \\
 &\leq \sum_{i=1}^N \left( \frac{1}{2} \|X_i^r y_i^{r+1} - z_i\|^2 + h_i(y_i^{r+1}) + \frac{\theta_i^r}{2} \|y_i^{r+1} - y_i^r\|^2 - \frac{1}{2} \|X_i^r y_i^r - z_i\|^2 - h_i(y_i^r) \right) \\
 &\leq \sum_{i=1}^N \left( \langle (X_i^r)^T (X_i^r y_i^{r+1} - z_i) + \theta_i^r (y_i^{r+1} - y_i^r), y_i^{r+1} - y_i^r \rangle - \frac{1}{2} \|X_i^r (y_i^{r+1} - y_i^r)\|^2 - \frac{\theta_i^r}{2} \|y_i^{r+1} - y_i^r\|^2 \right. \\
 &\quad \left. + \langle \zeta_i^{r+1}, y_i^{r+1} - y_i^r \rangle \right) \\
 &\leq - \sum_{i=1}^N \left( \frac{1}{2} \|X_i^r (y_i^{r+1} - y_i^r)\|^2 + \frac{\theta_i^r}{2} \|y_i^{r+1} - y_i^r\|^2 \right)
 \end{aligned} \tag{75}$$

where in the second to the last equality we have used the convexity of  $h_i$ , and  $\zeta_i^{r+1} \in \partial h_i(y_i^{r+1})$ ; the last inequality uses the optimality condition of the  $y$ -step (30b). Similarly, we can show that

$$L_\beta(X^{r+1}, Y^{r+1}, \Omega^r) - L_\beta(X^r, Y^{r+1}, \Omega^r) \leq -\frac{\beta + 2\gamma}{2} \|X^{r+1} - X^r\|_F^2 \tag{76}$$

where we have utilized the fact that  $A^T A + B^T B = 2D \succeq I_{NM}$ . Therefore, combining the estimate (74), we

2420 obtain

$$\begin{aligned}
 & L_\beta(\mathbf{X}^{r+1}, Y^{r+1}, \boldsymbol{\Omega}^{r+1}) - L_\beta(\mathbf{X}^r, Y^r, \boldsymbol{\Omega}^r) \\
 & \leq - \left( \frac{\beta + 2\gamma}{2} - \frac{8(\tau^2 + 4\gamma^2)}{\beta\sigma_{\min}} \right) \sum_{i=1}^N \|X_i^{r+1} - X_i^r\|_F^2 - \sum_{i=1}^N \left( \frac{\theta_i^r}{2} - \frac{8\theta_i^r}{\beta\sigma_{\min}} \right) \|y_i^{r+1} - y_i^r\|^2 \\
 & \quad - \left( \frac{1}{2} - \frac{8\tau}{\sigma_{\min}\beta} \right) \sum_{i=1}^N \|X_i^r(y_i^{r+1} - y_i^r)\|^2 \\
 & \quad + \frac{2\beta}{\sigma_{\min}} \|\mathbf{B}^T \mathbf{B}[(\mathbf{X}^{r+1} - \mathbf{X}^r) - (\mathbf{X}^r - \mathbf{X}^{r-1})]\|_F^2. \tag{77}
 \end{aligned}$$

2432 **Step 3.** This step follows Lemma 3 in the analysis of Algorithm 1. In particular, after writing down the  
 2433 optimality condition of the  $\mathbf{X}^{r+1}$  and  $\mathbf{X}^r$  step, we can obtain

$$\begin{aligned}
 & \langle \mathbf{A}^T(\boldsymbol{\Omega}^{r+1} - \boldsymbol{\Omega}^r), \mathbf{X}^{r+1} - \mathbf{X}^r \rangle \\
 & \leq - \langle \mathbf{M}^{r+1} - \mathbf{M}^r + \beta \mathbf{B}^T \mathbf{B} [(\mathbf{X}^{r+1} - \mathbf{X}^r) - (\mathbf{X}^r - \mathbf{X}^{r-1})], \mathbf{X}^{r+1} - \mathbf{X}^r \rangle.
 \end{aligned}$$

2439 Then it is easy to show that the above inequality implies the following

$$\begin{aligned}
 & \frac{\beta}{2} \left( \langle \mathbf{A}\mathbf{X}^{r+1}, \mathbf{A}\mathbf{X}^{r+1} \rangle + \langle \mathbf{B}^T \mathbf{B}(\mathbf{X}^{r+1} - \mathbf{X}^r), \mathbf{X}^{r+1} - \mathbf{X}^r \rangle \right) \\
 & \leq \frac{\beta}{2} \left( \langle \mathbf{A}\mathbf{X}^r, \mathbf{A}\mathbf{X}^r \rangle + \langle \mathbf{B}^T \mathbf{B}(\mathbf{X}^r - \mathbf{X}^{r-1}), \mathbf{X}^r - \mathbf{X}^{r-1} \rangle \right) - \frac{\beta}{2} \langle \mathbf{A}(\mathbf{X}^{r+1} - \mathbf{X}^r), \mathbf{A}(\mathbf{X}^{r+1} - \mathbf{X}^r) \rangle \\
 & \quad - \langle \mathbf{M}^{r+1} - \mathbf{M}^r, \mathbf{X}^{r+1} - \mathbf{X}^r \rangle - \frac{\beta}{2} \|\mathbf{B}[(\mathbf{X}^{r+1} - \mathbf{X}^r) - (\mathbf{X}^r - \mathbf{X}^{r-1})]\|_F^2.
 \end{aligned}$$

2448 Note the following fact

$$\begin{aligned}
 & - \langle \mathbf{M}^{r+1} - \mathbf{M}^r, \mathbf{X}^{r+1} - \mathbf{X}^r \rangle \\
 & = - \langle \nabla_{\mathbf{X}} f(\mathbf{X}^{r+1}, Y^{r+1}) - \nabla_{\mathbf{X}} f(\mathbf{X}^r, Y^r), \mathbf{X}^{r+1} - \mathbf{X}^r \rangle \\
 & = - \langle \nabla_{\mathbf{X}} f(\mathbf{X}^{r+1}, Y^{r+1}) - \nabla_{\mathbf{X}} f(\mathbf{X}^r, Y^{r+1}) + \nabla_{\mathbf{X}} f(\mathbf{X}^r, Y^{r+1}) - \nabla_{\mathbf{X}} f(\mathbf{X}^r, Y^r), \mathbf{X}^{r+1} - \mathbf{X}^r \rangle \\
 & \stackrel{(i)}{\leq} - \langle \nabla_{\mathbf{X}} f(\mathbf{X}^r, Y^{r+1}) - \nabla_{\mathbf{X}} f(\mathbf{X}^r, Y^r), \mathbf{X}^{r+1} - \mathbf{X}^r \rangle \\
 & \stackrel{(ii)}{\leq} \frac{1}{2d} \|\nabla_{\mathbf{X}} f(\mathbf{X}^r, Y^{r+1}) - \nabla_{\mathbf{X}} f(\mathbf{X}^r, Y^r)\|_F^2 + \frac{d}{2} \|\mathbf{X}^{r+1} - \mathbf{X}^r\|_F^2 \\
 & \stackrel{(iii)}{\leq} \frac{1}{d} \sum_{i=1}^N (\theta_i^r \|y_i^{r+1} - y_i^r\|^2 + \tau \|X_i^r(y_i^{r+1} - y_i^r)\|^2) + \frac{d}{2} \|\mathbf{X}^{r+1} - \mathbf{X}^r\|_F^2 \tag{78}
 \end{aligned}$$

2461 where in (i) we utilize the convexity of  $f(\mathbf{X}, Y)$  wrt  $\mathbf{X}$  for any fixed  $y$ ; in (ii) we use the Cauchy-Swartz inequality,  
 2462 where  $d > 0$  is a constant (to be determined later); (iii) is true due to a similar calculation as in (72).

2464 Overall we have

$$\begin{aligned}
 & \frac{\beta}{2} \left( \langle \mathbf{A}\mathbf{X}^{r+1}, \mathbf{A}\mathbf{X}^{r+1} \rangle + \langle \mathbf{B}^T \mathbf{B}(\mathbf{X}^{r+1} - \mathbf{X}^r), \mathbf{X}^{r+1} - \mathbf{X}^r \rangle \right) \\
 & \leq \frac{\beta}{2} \left( \langle \mathbf{A}\mathbf{X}^r, \mathbf{A}\mathbf{X}^r \rangle + \langle \mathbf{B}^T \mathbf{B}(\mathbf{X}^r - \mathbf{X}^{r-1}), \mathbf{X}^r - \mathbf{X}^{r-1} \rangle \right) - \frac{\beta}{2} \langle \mathbf{A}(\mathbf{X}^{r+1} - \mathbf{X}^r), \mathbf{A}(\mathbf{X}^{r+1} - \mathbf{X}^r) \rangle \\
 & \quad + \frac{1}{d} \sum_{i=1}^N (\theta_i^r \|y_i^{r+1} - y_i^r\|^2 + \tau \|X_i^r(y_i^{r+1} - y_i^r)\|^2) + \frac{d}{2} \|\mathbf{X}^{r+1} - \mathbf{X}^r\|_F^2 \\
 & \quad - \frac{\beta}{2} \|\mathbf{B}[(\mathbf{X}^{r+1} - \mathbf{X}^r) - (\mathbf{X}^r - \mathbf{X}^{r-1})]\|_F^2 \tag{79}
 \end{aligned}$$



2640 Then utilizing (74), we have

$$2641 \quad \mathbf{\Omega}^{r+1} - \mathbf{\Omega}^r \rightarrow \mathbf{0}, \text{ or equivalently } \mathbf{A}\mathbf{X}^{r+1} \rightarrow \mathbf{0}. \quad 2696$$

2642  
2643 That is, in the limit the network-wide consensus is achieved. Next we show that the primal and dual iterates are  
2644 bounded.

2645 Note that the potential function is both lower and upper bounded. Combined with (84) we must have that the  
2646 augmented Lagrangian is both upper and lower bounded. Using the expression (83), the assumption that  $h_i(y_i)$   
2647 is lower bounded, and the fact that  $y_i$  is bounded, we have that in the limit, the following term is bounded

$$2648 \quad \sum_{i=1}^N \frac{1}{2} \|X_i^{r+1} y_i^{r+1} - z_i\|^2 + \gamma \|X_i^{r+1}\|_F^2. \quad 2704$$

2649 This implies that the primal variable sequence  $\{X_i^{r+1}\}$  are bounded for all  $i$ . To show the boundedness of the  
2650 dual sequence, note that  $\mathbf{\Omega}^{r+1} \in \text{col}(\mathbf{A})$  (due to the initialization that  $\mathbf{\Omega}^0 = \mathbf{0}$ ). Therefore using (71) we have

$$2651 \quad \sigma_{\min}(\mathbf{A}^T \mathbf{A}) \|\mathbf{\Omega}^{r+1}\|_F^2 \leq 2 \|\mathbf{M}^{r+1}\|_F^2 + 2\beta \|\mathbf{B}^T \mathbf{B}(\mathbf{X}^{r+1} - \mathbf{X}^r)\|_F^2 \quad 2705$$

2652 Note that from the expression of  $\mathbf{M}$  in (70), we see that  $\{\mathbf{M}^{r+1}\}$  is bounded because both  $\mathbf{X}^{r+1}$  and  $\mathbf{Y}^{r+1}$  are  
2653 bounded. Similarly, the second term on the rhs of the above inequality is bounded because  $\mathbf{X}^{r+1} \rightarrow \mathbf{X}^r$ . These  
2654 two facts imply that  $\{\mathbf{\Omega}^{r+1}\}$  is bounded as well.

2655 Arguing the convergence to stationary point as well as the convergence rate follows exactly the same steps as in  
2656 the proof of Theorem 1.

### 2663 10.1. Prox-PDA-IP for Distributed Matrix Factorization

2664 In this section we extend the Prox-PDA for distributed matrix factorization utilizing increasing penalty pa-  
2665 rameters, just as what we have done in Section 5. In particular, when replacing the penalty parameter  $\beta$  by an  
2666 increasing sequence  $\{\beta^r\}$  that satisfies (21), the resulting algorithm also generates bounded  $\{\mathbf{X}^{r+1}\}$  and  $\{\mathbf{\Omega}^{r+1}\}$ ,  
2667 whose limit points are stationary points of problem (26). The detailed steps of this variant is given in Algorithm  
2668 3.

---

#### 2671 Algorithm 3 Prox-PDA-IP for Distributed Matrix Factorization

---

- 2672 1: At iteration 0, initialize  $\mathbf{\Omega}^0 = \mathbf{0}$ , and  $\mathbf{X}^0, y^0$   
2673 2: At each iteration  $r + 1$ , update variables by:

$$2674 \quad \theta_i^r = \|X_i^r y_i^r - z_i\|^2, \quad \forall i; \quad 2729$$

$$2675 \quad y_i^{r+1} = \arg \min_{\|y_i\|^2 \leq \tau} \frac{1}{2} \|X_i^r y_i - z_i\|^2 + h_i(y_i) \quad 2730$$

$$2676 \quad + \frac{\beta^{r+1} \theta_i^r}{2} \|y_i - y_i^r\|^2 + \frac{\beta^{r+1}}{2} \|X_i^r (y_i - y_i^r)\|^2, \quad \forall i; \quad 2731$$

$$2677 \quad \mathbf{X}^{r+1} = \arg \min_{\mathbf{X} \in \mathbb{R}^{N \times M \times K}} f(\mathbf{X}, \mathbf{Y}^{r+1}) + \langle \mathbf{\Omega}^r, \mathbf{A}\mathbf{X} \rangle + \frac{\beta^{r+1}}{2} \langle \mathbf{A}\mathbf{X}, \mathbf{A}\mathbf{X} \rangle + \frac{\beta^{r+1}}{2} \langle \mathbf{B}(\mathbf{X} - \mathbf{X}^r), \mathbf{B}(\mathbf{X} - \mathbf{X}^r) \rangle; \quad 2732$$

$$2678 \quad \mathbf{\Omega}^{r+1} = \mathbf{\Omega}^r + \beta^{r+1} \mathbf{A}\mathbf{X}^{r+1}. \quad 2733$$

2684  
2685 Now, we provide the proof of convergence for Algorithm 3. Our convergence claim is given below.

2686  
2687 **Theorem 4** Consider using Algorithm 3 to solve the distributed matrix factorization problem (27). Suppose that  
2688  $h(Y)$  is lower bounded over  $\text{dom } h$ , the penalty parameter  $\{\beta^r\}$  satisfies (21), and that the matrix  $B$  satisfies  
2689

$$2690 \quad B^T B \succ 0, \quad \text{and} \quad \|B^T B\| > 1. \quad 2744$$

2691 Then in the limit, consensus will be achieved, i.e.,

$$2692 \quad X_i = X_j, \quad \forall (i, j) \in \mathcal{E}. \quad 2745$$

2693  
2694

2695  
2696  
2697  
2698  
2699  
2700  
2701  
2702  
2703  
2704  
2705  
2706  
2707  
2708  
2709  
2710  
2711  
2712  
2713  
2714  
2715  
2716  
2717  
2718  
2719  
2720  
2721  
2722  
2723  
2724  
2725  
2726  
2727  
2728  
2729  
2730  
2731  
2732  
2733  
2734  
2735  
2736  
2737  
2738  
2739  
2740  
2741  
2742  
2743  
2744  
2745  
2746  
2747  
2748  
2749

2750 Further, the sequences  $\{\mathbf{X}^{r+1}\}$  and  $\{\boldsymbol{\Omega}^{r+1}\}$  are both bounded, and every limit point generated by Algorithm 5 is  
 2751 a stationary point for problem (27). 2805

2752 2806  
 2753 2807  
 2754 The proof essentially combines the analysis steps of Theorem 2 and 3. However the notation is significantly  
 2755 more complicated due to the increased number of terms involved in the analysis. We include the proof here for  
 2756 completeness. 2808  
 2809

2757 **Step 1.** Bound the size of the successive difference of  $\{\boldsymbol{\Omega}^r\}$ . Similarly as in the proof of Theorem 3, the  
 2758 optimality condition for the  $\mathbf{X}$ -update can be written as 2810  
 2759 2811

$$2760 \mathbf{A}^T \boldsymbol{\Omega}^{r+1} = -\mathbf{M}^{r+1} - \beta^{r+1} \mathbf{B}^T \mathbf{B} (\mathbf{X}^{r+1} - \mathbf{X}^r) \quad (87) \quad 2815$$

$$2761 \mathbf{A}^T \boldsymbol{\Omega}^r = -\mathbf{M}^r - \beta^r \mathbf{B}^T \mathbf{B} (\mathbf{X}^r - \mathbf{X}^{r-1}). \quad (88) \quad 2816$$

2762 2817  
 2763 2818  
 2764 Subtracting the above equations, we obtain 2819  
 2765 2820

$$2766 \mathbf{A}^T (\boldsymbol{\Omega}^{r+1} - \boldsymbol{\Omega}^r) = -(\mathbf{M}^{r+1} - \mathbf{M}^r) - \beta^r \mathbf{B}^T \mathbf{B} ((\mathbf{X}^{r+1} - \mathbf{X}^r) - (\mathbf{X}^r - \mathbf{X}^{r-1})) - (\beta^{r+1} - \beta^r) \mathbf{B}^T \mathbf{B} (\mathbf{X}^{r+1} - \mathbf{X}^r) \quad 2821$$

2767 2822  
 2768 Since  $\boldsymbol{\Omega}^{r+1} - \boldsymbol{\Omega}^r$  lies in the column space of  $\mathbf{A}$ , and the eigenvalues of  $A^T A$  equal to that of  $\mathbf{A}^T \mathbf{A}$ , we have 2823  
 2769 2824

$$2770 \sigma_{\min}(A^T A) \|\boldsymbol{\Omega}^{r+1} - \boldsymbol{\Omega}^r\|_F^2 \leq \|\mathbf{A} (\boldsymbol{\Omega}^{r+1} - \boldsymbol{\Omega}^r)\|_F^2, \quad 2825$$

2771 2826  
 2772 2827  
 2773 which results in 2828  
 2774 2829

$$2775 \frac{1}{\beta^{r+1}} \|\boldsymbol{\Omega}^{r+1} - \boldsymbol{\Omega}^r\|_F^2 \quad 2830$$

$$2776 \leq \frac{1}{\beta^{r+1} \sigma_{\min}(A^T A)} \left\| -(\mathbf{M}^{r+1} - \mathbf{M}^r) - \beta^r \mathbf{B}^T \mathbf{B} ((\mathbf{X}^{r+1} - \mathbf{X}^r) - (\mathbf{X}^r - \mathbf{X}^{r-1})) - (\beta^{r+1} - \beta^r) \mathbf{B}^T \mathbf{B} (\mathbf{X}^{r+1} - \mathbf{X}^r) \right\|^2 \quad 2831$$

$$2777 \leq \frac{3}{\beta^{r+1} \sigma_{\min}(A^T A)} \left( \|\mathbf{M}^{r+1} - \mathbf{M}^r\|_F^2 + (\beta^r)^2 \|\mathbf{B}^T \mathbf{B} ((\mathbf{X}^{r+1} - \mathbf{X}^r) - (\mathbf{X}^r - \mathbf{X}^{r-1}))\|_F^2 \right) \quad 2832$$

$$2778 \quad + (\beta^{r+1} - \beta^r)^2 \|\mathbf{B}^T \mathbf{B} (\mathbf{X}^{r+1} - \mathbf{X}^r)\|_F^2 \quad 2833$$

$$2779 \quad \left. \right) \quad 2834$$

$$2780 \quad (89) \quad 2835$$

2781 Also, from (72) we have 2836  
 2782 2837  
 2783 2838

$$2784 \|\mathbf{M}^{r+1} - \mathbf{M}^r\|_F^2 \leq \sum_{i=1}^N 4(\tau^2 + 4\gamma^2) \|X_i^{r+1} - X_i^r\|_F^2 + 4\theta_i^r \|y_i^{r+1} - y_i^r\|^2 + 4\tau \|X_i^r (y_i^{r+1} - y_i^r)\|^2. \quad (90) \quad 2839$$

2785 2840  
 2786 2841  
 2787 Thus, we have the following bound 2842  
 2788 2843  
 2789 2844

$$2790 \frac{1}{\beta^{r+1}} \|\boldsymbol{\Omega}^{r+1} - \boldsymbol{\Omega}^r\|_F^2 \quad 2845$$

$$2791 \leq \frac{12}{\beta^{r+1} \sigma_{\min}(A^T A)} \sum_{i=1}^N (\tau^2 + 4\gamma^2) \|X_i^{r+1} - X_i^r\|_F^2 + \theta_i^r \|y_i^{r+1} - y_i^r\|^2 + \tau \|X_i^r (y_i^{r+1} - y_i^r)\|^2 \quad (91) \quad 2846$$

$$2792 \quad + \frac{3(\beta^r)^2}{\beta^{r+1} \sigma_{\min}(A^T A)} \|\mathbf{B}^T \mathbf{B} ((\mathbf{X}^{r+1} - \mathbf{X}^r) - (\mathbf{X}^r - \mathbf{X}^{r-1}))\|_F^2 + \frac{3(\beta^{r+1} - \beta^r)^2}{\beta^{r+1} \sigma_{\min}(A^T A)} \|\mathbf{B}^T \mathbf{B} (\mathbf{X}^{r+1} - \mathbf{X}^r)\|_F^2. \quad 2847$$

$$2793 \quad 2848$$

$$2794 \quad 2849$$

$$2795 \quad 2850$$

2796 **Step 2.** We analyze the descent of the augmented Lagrangian. 2851  
 2797 2852

2798 First, as in (76), we utilize the strong convexity of the objective function of the  $\mathbf{X}$ -update (cf. (85c)) and obtain  
 2799 the following descent estimate for the  $\mathbf{X}$ -update 2853  
 2800 2854

$$2801 L_{\beta^{r+1}}(\mathbf{X}^{r+1}, Y^{r+1}, \boldsymbol{\Omega}^r) - L_{\beta^{r+1}}(\mathbf{X}^r, Y^{r+1}, \boldsymbol{\Omega}^r) \leq -\frac{\beta^{r+1} + 2\gamma}{2} \|\mathbf{X}^{r+1} - \mathbf{X}^r\|_F^2. \quad (92) \quad 2855$$

2802 2856  
 2803 Note that compared with (76) we have replaced  $\beta$  with  $\beta^{r+1}$ . 2857  
 2804 2858  
 2859

2860 Similarly, we have the following estimate for the descent of the  $Y$ -update

$$\begin{aligned}
 & L_{\beta^{r+1}}(\mathbf{X}^r, Y^{r+1}, \Omega^r) - L_{\beta^{r+1}}(\mathbf{X}^r, Y^r, \Omega^r) \\
 &= \sum_{i=1}^N \left( \frac{1}{2} \|X_i^r y_i^{r+1} - z_i\|^2 + h_i(y_i^{r+1}) - \frac{1}{2} \|X_i^r y_i^r - z_i\|^2 - h_i(y_i^r) \right) \\
 &\leq \sum_{i=1}^N \left( \frac{1}{2} \|X_i^r y_i^{r+1} - z_i\|^2 + h_i(y_i^{r+1}) + \frac{\beta^{r+1}\theta_i^r}{2} \|y_i^{r+1} - y_i^r\|^2 + \frac{\beta^{r+1}}{2} \|X_i^r (y_i^{r+1} - y_i^r)\|^2 \right) \\
 &\leq \sum_{i=1}^N \left( \left\langle (X_i^r)^T (X_i^r y_i^{r+1} - z_i) + \beta^{r+1}\theta_i^r (y_i^{r+1} - y_i^r) + \beta^{r+1}(X_i^r)^T (X_i^r y_i^{r+1} - X_i^r y_i^r), y_i^{r+1} - y_i^r \right\rangle \right. \\
 &\quad \left. - \frac{1}{2} \|X_i^r (y_i^{r+1} - y_i^r)\|^2 - \frac{\beta^{r+1}\theta_i^r}{2} \|y_i^{r+1} - y_i^r\|^2 - \frac{\beta^{r+1}}{2} \|X_i^r (y_i^{r+1} - y_i^r)\|^2 + \langle \varsigma_i^{r+1}, y_i^{r+1} - y_i^r \rangle \right) \\
 &\leq \sum_{i=1}^N \left( -\frac{1+\beta^{r+1}}{2} \|X_i^r (y_i^{r+1} - y_i^r)\|^2 - \frac{\beta^{r+1}\theta_i^r}{2} \|y_i^{r+1} - y_i^r\|^2 \right)
 \end{aligned} \tag{93}$$

2872 where in the second to last inequality,  $\varsigma_i^{r+1} \in \partial h_i(y_i^{r+1})$ ; the last inequality is true due to the optimality condition  
 2873 of the  $Y$ -update.

2875 Next we analyze the descent of the augmented Lagrangian. Let us first decompose the successive difference of  
 2876 the augmented Lagrangian into the following

$$\begin{aligned}
 & L_{\beta^{r+1}}(\mathbf{X}^{r+1}, Y^{r+1}, \Omega^{r+1}) - L_{\beta^r}(\mathbf{X}^r, Y^r, \Omega^r) \\
 &= L_{\beta^{r+1}}(\mathbf{X}^{r+1}, Y^{r+1}, \Omega^{r+1}) - L_{\beta^{r+1}}(\mathbf{X}^{r+1}, Y^{r+1}, \Omega^r) \\
 &\quad + L_{\beta^{r+1}}(\mathbf{X}^{r+1}, Y^{r+1}, \Omega^r) - L_{\beta^{r+1}}(\mathbf{X}^r, Y^{r+1}, \Omega^r) \\
 &\quad + L_{\beta^{r+1}}(\mathbf{X}^r, Y^{r+1}, \Omega^r) - L_{\beta^{r+1}}(\mathbf{X}^r, Y^r, \Omega^r) \\
 &\quad + L_{\beta^{r+1}}(\mathbf{X}^r, Y^r, \Omega^r) - L_{\beta^r}(\mathbf{X}^r, Y^r, \Omega^r) \\
 &\leq \frac{1}{\beta^{r+1}} \|\Omega^{r+1} - \Omega^r\|_F^2 - \frac{\beta^{r+1}+2\gamma}{2} \|\mathbf{X}^{r+1} - \mathbf{X}^r\|_F^2 - \sum_{i=1}^N \left( \frac{1+\beta^{r+1}}{2} \|X_i^r (y_i^{r+1} - y_i^r)\|^2 + \frac{\beta^{r+1}\theta_i^r}{2} \|y_i^{r+1} - y_i^r\|^2 \right) \\
 &\quad + \frac{\beta^{r+1}-\beta^r}{2(\beta^r)^2} \|\Omega^r - \Omega^{r-1}\|_F^2
 \end{aligned}$$

2886 where in the last inequality we have used the estimate given in (92) and (93). Plugging in the estimate (91), and  
 2887 (90), we have

$$\begin{aligned}
 & L_{\beta^{r+1}}(\mathbf{X}^{r+1}, Y^{r+1}, \Omega^{r+1}) - L_{\beta^r}(\mathbf{X}^r, Y^r, \Omega^r) \\
 &\leq \frac{3}{\beta^{r+1}\sigma_{\min}(A^T A)} \left( \|\mathbf{M}^{r+1} - \mathbf{M}^r\|_F^2 + (\beta^r)^2 \|\mathbf{B}^T \mathbf{B} ((\mathbf{X}^{r+1} - \mathbf{X}^r) - (\mathbf{X}^r - \mathbf{X}^{r-1}))\|_F^2 \right) \\
 &\quad + (\beta^{r+1} - \beta^r)^2 \|\mathbf{B}^T \mathbf{B} (\mathbf{X}^{r+1} - \mathbf{X}^r)\|_F^2 \\
 &\quad - \frac{\beta^{r+1}+2\gamma}{2} \|\mathbf{X}^{r+1} - \mathbf{X}^r\|_F^2 - \sum_{i=1}^N \left( \frac{1+\beta^{r+1}}{2} \|X_i^r (y_i^{r+1} - y_i^r)\|^2 + \frac{\beta^{r+1}\theta_i^r}{2} \|y_i^{r+1} - y_i^r\|^2 \right) \\
 &\quad + \frac{\beta^{r+1}-\beta^r}{2(\beta^r)^2} \|\Omega^r - \Omega^{r-1}\|_F^2 \\
 &\leq \frac{3}{\beta^{r+1}\sigma_{\min}(A^T A)} \sum_{i=1}^N \left( 4(\tau^2 + 4\gamma^2) \|X_i^{r+1} - X_i^r\|_F^2 + 4\theta_i^r \|y_i^{r+1} - y_i^r\|^2 + 4\tau \|X_i^r (y_i^{r+1} - y_i^r)\|^2 \right) \\
 &\quad + \frac{3(\beta^r)^2}{\beta^{r+1}\sigma_{\min}(A^T A)} \|\mathbf{B}^T \mathbf{B} ((\mathbf{X}^{r+1} - \mathbf{X}^r) - (\mathbf{X}^r - \mathbf{X}^{r-1}))\|_F^2 + \frac{3(\beta^{r+1}-\beta^r)^2}{\beta^{r+1}\sigma_{\min}(A^T A)} \|\mathbf{B}^T \mathbf{B} (\mathbf{X}^{r+1} - \mathbf{X}^r)\|_F^2 \\
 &\quad - \frac{\beta^{r+1}+2\gamma}{2} \|\mathbf{X}^{r+1} - \mathbf{X}^r\|_F^2 - \sum_{i=1}^N \left( \frac{1+\beta^{r+1}}{2} \|X_i^r (y_i^{r+1} - y_i^r)\|^2 + \frac{\beta^{r+1}\theta_i^r}{2} \|y_i^{r+1} - y_i^r\|^2 \right) \\
 &\quad + \frac{\beta^{r+1}-\beta^r}{2(\beta^r)^2} \|\Omega^r - \Omega^{r-1}\|_F^2 \\
 &= \left( \frac{12\theta_i^r}{\beta^{r+1}\sigma_{\min}(A^T A)} - \frac{\beta^{r+1}\theta_i^r}{2} \right) \sum_{i=1}^N \|y_i^{r+1} - y_i^r\|^2 + \left( \frac{12\tau}{\beta^{r+1}\sigma_{\min}(A^T A)} - \frac{1+\beta^{r+1}}{2} \right) \sum_{i=1}^N \|X_i^r (y_i^{r+1} - y_i^r)\|^2 \\
 &\quad + \frac{3(\beta^r)^2}{\beta^{r+1}\sigma_{\min}(A^T A)} \|\mathbf{B}^T \mathbf{B} ((\mathbf{X}^{r+1} - \mathbf{X}^r) - (\mathbf{X}^r - \mathbf{X}^{r-1}))\|_F^2 \\
 &\quad + \left( \frac{12(\tau^2+4\gamma^2)}{\beta^{r+1}\sigma_{\min}(A^T A)} + \frac{3(\beta^{r+1}-\beta^r)^2}{\beta^{r+1}\sigma_{\min}(A^T A)} \|\mathbf{B}^T \mathbf{B}\|_F^2 - \frac{\beta^{r+1}+2\gamma}{2} \right) \|(\mathbf{X}^{r+1} - \mathbf{X}^r)\|_F^2 \\
 &\quad + \frac{\beta^{r+1}-\beta^r}{2(\beta^r)^2} \|\Omega^r - \Omega^{r-1}\|_F^2.
 \end{aligned} \tag{94}$$

2911 **Step 3.** We construct the remaining part of the potential function. From the optimality condition of the  
 2912  $\mathbf{X}$ -update, we obtain

$$\langle \mathbf{A}^T \Omega^{r+1} + \mathbf{M}^{r+1} + \beta^{r+1} \mathbf{B}^T \mathbf{B} (\mathbf{X}^{r+1} - \mathbf{X}^r), \mathbf{X}^{r+1} - \mathbf{X} \rangle \leq 0, \tag{95}$$

$$\langle \mathbf{A}^T \boldsymbol{\Omega}^r + \mathbf{M}^r + \beta^r \mathbf{B}^T \mathbf{B} (\mathbf{X}^r - \mathbf{X}^{r-1}), \mathbf{X}^r - \mathbf{X} \rangle \leq 0. \quad (96)$$

Plugging  $\mathbf{X} = \mathbf{X}^r$  and  $\mathbf{X} = \mathbf{X}^{r+1}$  into (95) and (96) and adding them together, we have

$$\begin{aligned} & \langle \mathbf{A}^T (\boldsymbol{\Omega}^{r+1} - \boldsymbol{\Omega}^r), \mathbf{X}^{r+1} - \mathbf{X}^r \rangle \\ & \leq - \langle \mathbf{M}^{r+1} - \mathbf{M}^r, \mathbf{X}^{r+1} - \mathbf{X}^r \rangle - \langle \mathbf{B}^T \mathbf{B} (\beta^{r+1} (\mathbf{X}^{r+1} - \mathbf{X}^r) - \beta^r (\mathbf{X}^r - \mathbf{X}^{r-1})), \mathbf{X}^{r+1} - \mathbf{X}^r \rangle. \end{aligned} \quad (97)$$

The lhs of (97) can be expressed as

$$\begin{aligned} & \langle \mathbf{A}^T (\boldsymbol{\Omega}^{r+1} - \boldsymbol{\Omega}^r), \mathbf{X}^{r+1} - \mathbf{X}^r \rangle \\ & = \langle \beta^{r+1} \mathbf{A} \mathbf{X}^{r+1}, \mathbf{A} \mathbf{X}^{r+1} - \mathbf{A} \mathbf{X}^r \rangle \\ & = \beta^{r+1} \|\mathbf{A} \mathbf{X}^{r+1}\|_F^2 - \beta^{r+1} \langle \mathbf{A} \mathbf{X}^{r+1}, \mathbf{A} \mathbf{X}^r \rangle \\ & = \frac{\beta^{r+1}}{2} \|\mathbf{A} \mathbf{X}^{r+1}\|_F^2 - \frac{\beta^{r+1}}{2} \|\mathbf{A} \mathbf{X}^r\|_F^2 + \frac{\beta^{r+1}}{2} \|\mathbf{A} (\mathbf{X}^{r+1} - \mathbf{X}^r)\|_F^2 \\ & = \frac{\beta^{r+1}}{2} \|\mathbf{A} \mathbf{X}^{r+1}\|_F^2 - \frac{\beta^r}{2} \|\mathbf{A} \mathbf{X}^r\|_F^2 + \frac{(\beta^r - \beta^{r+1})}{2} \|\mathbf{A} \mathbf{X}^r\|_F^2 + \frac{\beta^{r+1}}{2} \|\mathbf{A} (\mathbf{X}^{r+1} - \mathbf{X}^r)\|_F^2. \end{aligned} \quad (98)$$

Noting the following fact (cf. (78))

$$- \langle \mathbf{M}^{r+1} - \mathbf{M}^r, \mathbf{X}^{r+1} - \mathbf{X}^r \rangle \leq \frac{1}{d} \sum_{i=1}^N \left( \theta_i^r \|y_i^{r+1} - y_i^r\|^2 + \tau \|X_i^r (y_i^{r+1} - y_i^r)\|^2 \right) + \frac{d}{2} \|\mathbf{X}^{r+1} - \mathbf{X}^r\|_F^2, \quad (99)$$

where  $d > 0$  is a constant. The rhs of (97) can be rewritten as

$$\begin{aligned} & - \langle \mathbf{M}^{r+1} - \mathbf{M}^r, \mathbf{X}^{r+1} - \mathbf{X}^r \rangle - \langle \mathbf{B}^T \mathbf{B} (\beta^{r+1} (\mathbf{X}^{r+1} - \mathbf{X}^r) - \beta^r (\mathbf{X}^r - \mathbf{X}^{r-1})), \mathbf{X}^{r+1} - \mathbf{X}^r \rangle \\ & \leq \frac{1}{d} \sum_{i=1}^N \left( \theta_i^r \|y_i^{r+1} - y_i^r\|^2 + \tau \|X_i^r (y_i^{r+1} - y_i^r)\|^2 \right) + \frac{d}{2} \|\mathbf{X}^{r+1} - \mathbf{X}^r\|_F^2 \\ & \quad - \beta^{r+1} \|\mathbf{X}^{r+1} - \mathbf{X}^r\|_{\mathbf{B}^T \mathbf{B}}^2 + \beta^r \langle \mathbf{B}^T \mathbf{B} (\mathbf{X}^r - \mathbf{X}^{r-1}), \mathbf{X}^{r+1} - \mathbf{X}^r \rangle \\ & \leq \frac{1}{d} \sum_{i=1}^N \left( \theta_i^r \|y_i^{r+1} - y_i^r\|^2 + \tau \|X_i^r (y_i^{r+1} - y_i^r)\|^2 \right) + \frac{d}{2} \|\mathbf{X}^{r+1} - \mathbf{X}^r\|_F^2 - (\beta^{r+1} - \beta^r) \|\mathbf{X}^{r+1} - \mathbf{X}^r\|_{\mathbf{B}^T \mathbf{B}}^2 \\ & \quad + \frac{\beta^r}{2} \left( \|\mathbf{X}^r - \mathbf{X}^{r-1}\|_{\mathbf{B}^T \mathbf{B}}^2 - \|\mathbf{X}^{r+1} - \mathbf{X}^r\|_{\mathbf{B}^T \mathbf{B}}^2 - \|\mathbf{X}^{r+1} - \mathbf{X}^r - (\mathbf{X}^r - \mathbf{X}^{r-1})\|_{\mathbf{B}^T \mathbf{B}}^2 \right) \\ & = \frac{1}{d} \sum_{i=1}^N \left( \theta_i^r \|y_i^{r+1} - y_i^r\|^2 + \tau \|X_i^r (y_i^{r+1} - y_i^r)\|^2 \right) + \frac{d}{2} \|\mathbf{X}^{r+1} - \mathbf{X}^r\|_F^2 - \frac{(\beta^{r+1} - \beta^r)}{2} \|\mathbf{X}^{r+1} - \mathbf{X}^r\|_{\mathbf{B}^T \mathbf{B}}^2 \\ & \quad - \frac{\beta^{r+1}}{2} \|\mathbf{X}^{r+1} - \mathbf{X}^r\|_{\mathbf{B}^T \mathbf{B}}^2 + \frac{\beta^r}{2} \|\mathbf{X}^r - \mathbf{X}^{r-1}\|_{\mathbf{B}^T \mathbf{B}}^2 - \frac{\beta^r}{2} \|\mathbf{X}^{r+1} - \mathbf{X}^r - (\mathbf{X}^r - \mathbf{X}^{r-1})\|_{\mathbf{B}^T \mathbf{B}}^2 \\ & \leq \frac{1}{d} \sum_{i=1}^N \left( \theta_i^r \|y_i^{r+1} - y_i^r\|^2 + \tau \|X_i^r (y_i^{r+1} - y_i^r)\|^2 \right) + \frac{d}{2} \|\mathbf{X}^{r+1} - \mathbf{X}^r\|_F^2 - \frac{\beta^{r+1}}{2} \|\mathbf{X}^{r+1} - \mathbf{X}^r\|_{\mathbf{B}^T \mathbf{B}}^2 \\ & \quad + \frac{\beta^r}{2} \|\mathbf{X}^r - \mathbf{X}^{r-1}\|_{\mathbf{B}^T \mathbf{B}}^2 - \frac{\beta^r}{2} \|\mathbf{X}^{r+1} - \mathbf{X}^r - (\mathbf{X}^r - \mathbf{X}^{r-1})\|_{\mathbf{B}^T \mathbf{B}}^2, \end{aligned} \quad (100)$$

where the first inequality is obtained by plugging in (99); in the last inequality we have used the fact that  $\beta^{r+1} \geq \beta^r$ .

Therefore, combining (98) and (100), we obtain

$$\begin{aligned} & \frac{\beta^{r+1}}{2} \|\mathbf{A} \mathbf{X}^{r+1}\|_F^2 + \frac{\beta^{r+1}}{2} \|\mathbf{X}^{r+1} - \mathbf{X}^r\|_{\mathbf{B}^T \mathbf{B}}^2 \\ & \leq \frac{\beta^r}{2} \|\mathbf{A} \mathbf{X}^r\|_F^2 + \frac{\beta^r}{2} \|\mathbf{X}^r - \mathbf{X}^{r-1}\|_{\mathbf{B}^T \mathbf{B}}^2 + \frac{1}{d} \sum_{i=1}^N \left( \theta_i^r \|y_i^{r+1} - y_i^r\|^2 + \tau \|X_i^r (y_i^{r+1} - y_i^r)\|^2 \right) + \frac{d}{2} \|\mathbf{X}^{r+1} - \mathbf{X}^r\|_F^2 \\ & \quad - \frac{\beta^r}{2} \|\mathbf{X}^{r+1} - \mathbf{X}^r - (\mathbf{X}^r - \mathbf{X}^{r-1})\|_{\mathbf{B}^T \mathbf{B}}^2 - \frac{(\beta^r - \beta^{r+1})}{2(\beta^r)^2} \|\boldsymbol{\Omega}^r - \boldsymbol{\Omega}^{r-1}\|_F^2. \end{aligned}$$

3080 Multiplying both sides by  $\beta^r$ , we have

$$\begin{aligned}
 & \frac{\beta^{r+1}\beta^r}{2} \|\mathbf{A}\mathbf{X}^{r+1}\|_F^2 + \frac{\beta^r\beta^{r+1}}{2} \|\mathbf{X}^{r+1} - \mathbf{X}^r\|_{\mathbf{B}^T\mathbf{B}}^2 \\
 & \leq \frac{\beta^r\beta^{r-1}}{2} \|\mathbf{A}\mathbf{X}^r\|_F^2 + \frac{\beta^r\beta^{r-1}}{2} \|\mathbf{X}^r - \mathbf{X}^{r-1}\|_{\mathbf{B}^T\mathbf{B}}^2 + \frac{\beta^r}{d} \sum_{i=1}^N \left( \theta_i^r \|y_i^{r+1} - y_i^r\|^2 + \tau \|X_i^r (y_i^{r+1} - y_i^r)\|^2 \right) \\
 & + \frac{d\beta^r}{2} \|\mathbf{X}^{r+1} - \mathbf{X}^r\|_F^2 - \frac{(\beta^r)^2}{2} \|\mathbf{X}^{r+1} - \mathbf{X}^r - (\mathbf{X}^r - \mathbf{X}^{r-1})\|_{\mathbf{B}^T\mathbf{B}}^2 - \frac{(\beta^r - \beta^{r-1})}{2\beta^r} \|\boldsymbol{\Omega}^r - \boldsymbol{\Omega}^{r-1}\|_F^2 \\
 & + \frac{\beta^r(\beta^r - \beta^{r-1})}{2} \|\mathbf{A}\mathbf{X}^r\|_F^2 + \frac{\beta^r(\beta^r - \beta^{r-1})}{2} \|\mathbf{X}^r - \mathbf{X}^{r-1}\|_{\mathbf{B}^T\mathbf{B}}^2 \tag{101} \\
 & = \frac{\beta^r\beta^{r-1}}{2} \|\mathbf{A}\mathbf{X}^r\|_F^2 + \frac{\beta^r\beta^{r-1}}{2} \|\mathbf{X}^r - \mathbf{X}^{r-1}\|_{\mathbf{B}^T\mathbf{B}}^2 + \frac{\beta^r}{d} \sum_{i=1}^N \left( \theta_i^r \|y_i^{r+1} - y_i^r\|^2 + \tau \|X_i^r (y_i^{r+1} - y_i^r)\|^2 \right) \\
 & + \frac{d\beta^r}{2} \|\mathbf{X}^{r+1} - \mathbf{X}^r\|_F^2 - \frac{(\beta^r)^2}{2} \|\mathbf{X}^{r+1} - \mathbf{X}^r - (\mathbf{X}^r - \mathbf{X}^{r-1})\|_{\mathbf{B}^T\mathbf{B}}^2 + \frac{(\beta^{r+1} - \beta^{r-1})}{2\beta^r} \|\boldsymbol{\Omega}^r - \boldsymbol{\Omega}^{r-1}\|_F^2 \\
 & + \frac{\beta^r(\beta^r - \beta^{r-1})}{2} \|\mathbf{X}^r - \mathbf{X}^{r-1}\|_{\mathbf{B}^T\mathbf{B}}^2
 \end{aligned}$$

3096 **Step 4.** In this step, we construct and estimate the descent of the potential function. With  $c > 0$ , let us define  
 3097 the potential function as

$$\begin{aligned}
 & P_{\beta^{r+1},c}(\mathbf{X}^{r+1}, \mathbf{X}^r, Y^{r+1}, \boldsymbol{\Omega}^{r+1}) \\
 & = L_{\beta^{r+1}}(\mathbf{X}^{r+1}, Y^{r+1}, \boldsymbol{\Omega}^{r+1}) + \frac{c\beta^{r+1}\beta^r}{2} \|\mathbf{A}\mathbf{X}^{r+1}\|_F^2 + \frac{c\beta^r\beta^{r+1}}{2} \|\mathbf{X}^{r+1} - \mathbf{X}^r\|_{\mathbf{B}^T\mathbf{B}}^2 \tag{102}
 \end{aligned}$$

3104 Combining the estimate in (94) and (101), we obtain

$$\begin{aligned}
 & P_{\beta^{r+1},c}(\mathbf{X}^{r+1}, \mathbf{X}^r, Y^{r+1}, \boldsymbol{\Omega}^{r+1}) - P_{\beta^r,c}(\mathbf{X}^r, \mathbf{X}^{r-1}, Y^r, \boldsymbol{\Omega}^r) \\
 & = L_{\beta^{r+1}}(\mathbf{X}^{r+1}, Y^{r+1}, \boldsymbol{\Omega}^{r+1}) - L_{\beta^r}(\mathbf{X}^r, Y^r, \boldsymbol{\Omega}^r) + \frac{c\beta^{r+1}\beta^r}{2} \|\mathbf{A}\mathbf{X}^{r+1}\|_F^2 \\
 & + \frac{c\beta^r\beta^{r+1}}{2} \|\mathbf{X}^{r+1} - \mathbf{X}^r\|_{\mathbf{B}^T\mathbf{B}}^2 - \frac{c\beta^r\beta^{r-1}}{2} \|\mathbf{A}\mathbf{X}^r\|_F^2 - \frac{c\beta^r\beta^{r-1}}{2} \|\mathbf{X}^r - \mathbf{X}^{r-1}\|_{\mathbf{B}^T\mathbf{B}}^2 \\
 & \leq \left( \frac{12\theta_i^r}{\beta^{r+1}\sigma_{\min}(A^T A)} - \frac{\beta^{r+1}\theta_i^r}{2} \right) \sum_{i=1}^N \|y_i^{r+1} - y_i^r\|^2 + \left( \frac{12\tau}{\beta^{r+1}\sigma_{\min}(A^T A)} - \frac{1+\beta^{r+1}}{2} \right) \sum_{i=1}^N \|X_i^r (y_i^{r+1} - y_i^r)\|^2 \\
 & + \frac{3(\beta^r)^2}{\beta^{r+1}\sigma_{\min}(A^T A)} \|\mathbf{B}^T\mathbf{B}((\mathbf{X}^{r+1} - \mathbf{X}^r) - (\mathbf{X}^r - \mathbf{X}^{r-1}))\|_F^2 \\
 & + \left( \frac{12(\tau^2 + 4\gamma^2)}{\beta^{r+1}\sigma_{\min}(A^T A)} + \frac{3(\beta^{r+1} - \beta^r)^2 \|\mathbf{B}^T\mathbf{B}\|_F^2}{\beta^{r+1}\sigma_{\min}(A^T A)} - \frac{\beta^{r+1} + 2\gamma}{2} \right) \|(\mathbf{X}^{r+1} - \mathbf{X}^r)\|_F^2 + \frac{\beta^{r+1} - \beta^r}{2(\beta^r)^2} \|\boldsymbol{\Omega}^r - \boldsymbol{\Omega}^{r-1}\|_F^2 \\
 & + \frac{c\beta^r}{d} \sum_{i=1}^N \left( \theta_i^r \|y_i^{r+1} - y_i^r\|^2 + \tau \|X_i^r (y_i^{r+1} - y_i^r)\|^2 \right) + \frac{dc\beta^r}{2} \|\mathbf{X}^{r+1} - \mathbf{X}^r\|_F^2 \\
 & - \frac{c(\beta^r)^2}{2} \|\mathbf{X}^{r+1} - \mathbf{X}^r - (\mathbf{X}^r - \mathbf{X}^{r-1})\|_{\mathbf{B}^T\mathbf{B}}^2 + \frac{c(\beta^{r+1} - \beta^{r-1})}{2\beta^r} \|\boldsymbol{\Omega}^r - \boldsymbol{\Omega}^{r-1}\|_F^2 \tag{103} \\
 & + \frac{c\beta^r(\beta^r - \beta^{r-1})}{2} \|\mathbf{X}^r - \mathbf{X}^{r-1}\|_{\mathbf{B}^T\mathbf{B}}^2 \\
 & \leq \left( \frac{12\theta_i^r}{\beta^{r+1}\sigma_{\min}(A^T A)} - \frac{\beta^{r+1}\theta_i^r}{2} + \frac{c\beta^r\theta_i^r}{d} \right) \sum_{i=1}^N \|y_i^{r+1} - y_i^r\|^2 \\
 & + \left( \frac{12\tau}{\beta^{r+1}\sigma_{\min}(A^T A)} - \frac{1+\beta^{r+1}}{2} + \frac{c\beta^r\tau}{d} \right) \sum_{i=1}^N \|X_i^r (y_i^{r+1} - y_i^r)\|^2 \\
 & + \left( \frac{3(\beta^r)^2 \|\mathbf{B}^T\mathbf{B}\|}{\beta^{r+1}\sigma_{\min}(A^T A)} - \frac{c(\beta^r)^2}{2} \right) \|((\mathbf{X}^{r+1} - \mathbf{X}^r) - (\mathbf{X}^r - \mathbf{X}^{r-1}))\|_{\mathbf{B}^T\mathbf{B}}^2 \\
 & + \left( \frac{12(\tau^2 + 4\gamma^2)}{\beta^{r+1}\sigma_{\min}(A^T A)} + \frac{3(\beta^{r+1} - \beta^r)^2 \|\mathbf{B}^T\mathbf{B}\|_F^2}{\beta^{r+1}\sigma_{\min}(A^T A)} - \frac{\beta^{r+1} + 2\gamma}{2} + \frac{dc\beta^r}{2} \right) \|(\mathbf{X}^{r+1} - \mathbf{X}^r)\|_F^2 \\
 & + \left( \frac{\beta^{r+1} - \beta^{r-1}}{2(\beta^r)^2} + \frac{c(\beta^{r+1} - \beta^{r-1})}{2\beta^r} \right) \|\boldsymbol{\Omega}^r - \boldsymbol{\Omega}^{r-1}\|_F^2 + \frac{c\beta^r(\beta^r - \beta^{r-1})}{2} \|\mathbf{X}^r - \mathbf{X}^{r-1}\|_{\mathbf{B}^T\mathbf{B}}^2
 \end{aligned}$$

3132 where the first inequality is obtained by plugging in (94) and (101); in the last inequality we have used the fact  
 3133 that  $\beta^{r+1} \geq \beta^r$ . Taking the sum of  $r$  from  $t$  to  $T+1$  (for some  $T > t > 1$ ) and utilize the estimate in (91), we  
 3134

3190 have

$$\begin{aligned}
 & P_{\beta^{r+1},c}(\mathbf{X}^{T+1}, \mathbf{X}^T, Y^{T+1}, \mathbf{\Omega}^{T+1}) - P_{\beta^t,c}(\mathbf{X}^t, \mathbf{X}^{t-1}, Y^t, \mathbf{\Omega}^t) \\
 & \left( \begin{aligned}
 & \left( \frac{12\theta_i^r}{\beta^{r+1}\sigma_{\min}(A^T A)} - \frac{\beta^{r+1}\theta_i^r}{2} + \frac{c\beta^r\theta_i^r}{d} \right) \sum_{i=1}^N \|y_i^{r+1} - y_i^r\|^2 \\
 & + \left( \frac{12\tau}{\beta^{r+1}\sigma_{\min}(A^T A)} - \frac{1+\beta^{r+1}}{2} + \frac{c\beta^r\tau}{d} \right) \sum_{i=1}^N \|X_i^r (y_i^{r+1} - y_i^r)\|^2 \\
 & + \left( \frac{3(\beta^r)^2 \|\mathbf{B}^T \mathbf{B}\|}{\beta^{r+1}\sigma_{\min}(A^T A)} - \frac{c(\beta^r)^2}{2} \right) \|((\mathbf{X}^{r+1} - \mathbf{X}^r) - (\mathbf{X}^r - \mathbf{X}^{r-1}))\|_{\mathbf{B}^T \mathbf{B}}^2 \\
 & + \left( \frac{12(\tau^2+4\gamma^2)}{\beta^{r+1}\sigma_{\min}(A^T A)} + \frac{3(\beta^{r+1}-\beta^r)^2 \|\mathbf{B}^T \mathbf{B}\|_F^2}{\beta^{r+1}\sigma_{\min}(A^T A)} - \frac{\beta^{r+1}+2\gamma}{2} + \frac{dc\beta^r}{2} \right) \|(\mathbf{X}^{r+1} - \mathbf{X}^r)\|_F^2 \\
 & + \left( \frac{\beta^{r+1}-\beta^{r-1}}{2(\beta^r)^2} + \frac{c(\beta^{r+1}-\beta^{r-1})}{2\beta^r} \right) \|\mathbf{\Omega}^r - \mathbf{\Omega}^{r-1}\|_F^2 + \frac{c\beta^r(\beta^r-\beta^{r-1})}{2} \|\mathbf{X}^r - \mathbf{X}^{r-1}\|_{\mathbf{B}^T \mathbf{B}}^2
 \end{aligned} \right) \\
 & \leq \sum_{r=t}^T \left( \begin{aligned}
 & \left( \frac{12\theta_i^r}{\beta^{r+1}\sigma_{\min}(A^T A)} - \frac{\beta^{r+1}\theta_i^r}{2} + \frac{c\beta^r\theta_i^r}{d} + \left( \frac{\beta^{r+2}-\beta^r}{2\beta^{r+1}} \right) \left( \frac{1}{\beta^{r+1}} + c \right) \frac{12\theta_i^r}{\sigma_{\min}(A^T A)} \right) \sum_{i=1}^N \|y_i^{r+1} - y_i^r\|^2 \\
 & + \left( \frac{12\tau}{\beta^{r+1}\sigma_{\min}(A^T A)} - \frac{1+\beta^{r+1}}{2} + \frac{c\beta^r\tau}{d} + \left( \frac{\beta^{r+2}-\beta^r}{2\beta^{r+1}} \right) \left( \frac{1}{\beta^{r+1}} + c \right) \frac{12\tau}{\sigma_{\min}(A^T A)} \right) \sum_{i=1}^N \|X_i^r (y_i^{r+1} - y_i^r)\|^2 \\
 & + \left( \frac{3(\beta^r)^2 \|\mathbf{B}^T \mathbf{B}\|}{\beta^{r+1}\sigma_{\min}(A^T A)} - \frac{c(\beta^r)^2}{2} + \left( \frac{\beta^{r+2}-\beta^r}{2\beta^{r+1}} \right) \left( \frac{1}{\beta^{r+1}} + c \right) \frac{3(\beta^r)^2 \|\mathbf{B}^T \mathbf{B}\|}{\sigma_{\min}(A^T A)} \right) \|((\mathbf{X}^{r+1} - \mathbf{X}^r) - (\mathbf{X}^r - \mathbf{X}^{r-1}))\|_{\mathbf{B}^T \mathbf{B}}^2 \\
 & + \left( \frac{12(\tau^2+4\gamma^2)}{\beta^{r+1}\sigma_{\min}(A^T A)} + \frac{3(\beta^{r+1}-\beta^r)^2 \|\mathbf{B}^T \mathbf{B}\|_F^2}{\beta^{r+1}\sigma_{\min}(A^T A)} - \frac{\beta^{r+1}+2\gamma}{2} + \frac{dc\beta^r}{2} + \frac{c\beta^{r+1}(\beta^{r+1}-\beta^r) \|\mathbf{B}^T \mathbf{B}\|}{2} + \left( \frac{\beta^{r+2}-\beta^r}{2\beta^{r+1}} \right) \left( \frac{1}{\beta^{r+1}} + c \right) \frac{12(\tau^2+4\gamma^2)}{\sigma_{\min}(A^T A)} \right) \|(\mathbf{X}^{r+1} - \mathbf{X}^r)\|_F^2 \\
 & + \left( \frac{\beta^{r+2}-\beta^r}{2\beta^{r+1}} \right) \left( \frac{1}{\beta^{r+1}} + c \right) \frac{3(\beta^{r+1}-\beta^r)^2 \|\mathbf{B}^T \mathbf{B}\|_F^2}{\sigma_{\min}(A^T A)}
 \end{aligned} \right) \|(\mathbf{X}^{r+1} - \mathbf{X}^r)\|_F^2 \\
 & + \frac{c\beta^t(\beta^t-\beta^{t-1})}{2} \|\mathbf{X}^t - \mathbf{X}^{t-1}\|_{\mathbf{B}^T \mathbf{B}}^2 + \left( \frac{\beta^{t+1}-\beta^{t-1}}{2(\beta^t)^2} + \frac{c(\beta^{t+1}-\beta^{t-1})}{2\beta^t} \right) \|\mathbf{\Omega}^t - \mathbf{\Omega}^{t-1}\|_F^2.
 \end{aligned} \right) \tag{104}
 \end{aligned}$$

 3219 It can be observed that the coefficient in front of  $\|((\mathbf{X}^{r+1} - \mathbf{X}^r) - (\mathbf{X}^r - \mathbf{X}^{r-1}))\|_{\mathbf{B}^T \mathbf{B}}^2$  becomes negative for  
 3220 sufficiently large (but finite)  $t$ .

 3221 Suppose that  $r$  is large enough such that  $\frac{12(\tau^2+4\gamma^2)}{\beta^{r+1}\sigma_{\min}(A^T A)} + \frac{3(\beta^{r+1}-\beta^r)^2 \|\mathbf{B}^T \mathbf{B}\|_F^2}{\beta^{r+1}\sigma_{\min}(A^T A)} - \frac{\beta^{r+1}+2\gamma}{2} < -\frac{\beta^{r+1}}{3}$  and choose  
 3222  $c = \min\{1/(2d), 1/(12\kappa\|\mathbf{B}^T \mathbf{B}\|)\}$ , then we have

$$\begin{aligned}
 & \frac{12(\tau^2+4\gamma^2)}{\beta^{r+1}\sigma_{\min}(A^T A)} + \frac{3(\beta^{r+1}-\beta^r)^2 \|\mathbf{B}^T \mathbf{B}\|_F^2}{\beta^{r+1}\sigma_{\min}(A^T A)} - \frac{\beta^{r+1}+2\gamma}{2} + \frac{dc\beta^r}{2} + \frac{c\beta^{r+1}(\beta^{r+1}-\beta^r) \|\mathbf{B}^T \mathbf{B}\|}{2} \\
 & < -\frac{\beta^{r+1}}{3} + \frac{\beta^r}{4} + \frac{\beta^r}{24} = -\frac{\beta^{r+1}}{24}
 \end{aligned}$$

 3229 We can also show that for sufficiently large  $r$ , the following is true

$$\left( \frac{\beta^{r+2}-\beta^r}{2\beta^{r+1}} \right) \left( \frac{1}{\beta^{r+1}} + c \right) \frac{12(\tau^2+4\gamma^2)}{\sigma_{\min}(A^T A)} + \left( \frac{\beta^{r+2}-\beta^r}{2\beta^{r+1}} \right) \left( \frac{1}{\beta^{r+1}} + c \right) \frac{3(\beta^{r+1}-\beta^r)^2 \|\mathbf{B}^T \mathbf{B}\|_F^2}{\sigma_{\min}(A^T A)} \leq \frac{\beta^{r+1}}{48},$$

$$\frac{3(\beta^r)^2 \|\mathbf{B}^T \mathbf{B}\|}{\beta^{r+1}\sigma_{\min}(A^T A)} - \frac{c(\beta^r)^2}{2} + \left( \frac{\beta^{r+2}-\beta^r}{2\beta^{r+1}} \right) \left( \frac{1}{\beta^{r+1}} + c \right) \frac{3(\beta^r)^2 \|\mathbf{B}^T \mathbf{B}\|}{\sigma_{\min}(A^T A)} \leq -\frac{c(\beta^r)^2}{48}.$$

 3238 Furthermore, if we choose  $d = \max\{1, \sqrt{\tau}\}$ , the coefficients in front of the following terms would be negative for  
 3239 sufficiently large  $r$ 

$$\sum_{i=1}^N \|y_i^{r+1} - y_i^r\|^2, \sum_{i=1}^N \|X_i^r (y_i^{r+1} - y_i^r)\|^2, \|((\mathbf{X}^{r+1} - \mathbf{X}^r) - (\mathbf{X}^r - \mathbf{X}^{r-1}))\|_{\mathbf{B}^T \mathbf{B}}^2, \|(\mathbf{X}^{r+1} - \mathbf{X}^r)\|_F^2.$$

In conclusion, we have that for sufficiently large but finite  $t_0$ , we have

$$\begin{aligned}
 & P_{\beta^{T+1},c}(\mathbf{X}^{T+1}, \mathbf{X}^T, Y^{T+1}, \mathbf{\Omega}^{T+1}) - P_{\beta^{t_0},c}(\mathbf{X}^t, \mathbf{X}^{t-1}, Y^t, \mathbf{\Omega}^t) \\
 & \leq \sum_{t=t_0}^T -\frac{\beta^{r+1}}{48} \|(\mathbf{X}^{r+1} - \mathbf{X}^r)\|_F^2 - \frac{c(\beta^r)^2}{48} \|((\mathbf{X}^{r+1} - \mathbf{X}^r) - (\mathbf{X}^r - \mathbf{X}^{r-1}))\|_{\mathbf{B}^T \mathbf{B}}^2 \\
 & \quad + \frac{c\beta^{t_0}(\beta^{t_0} - \beta^{t_0-1})}{2} \|\mathbf{X}^{t_0} - \mathbf{X}^{t_0-1}\|_{\mathbf{B}^T \mathbf{B}}^2 + \left( \frac{\beta^{t_0+1} - \beta^{t_0-1}}{2(\beta^{t_0})^2} + \frac{c(\beta^{t_0+1} - \beta^{t_0-1})}{2\beta^{t_0}} \right) \|\mathbf{\Omega}^{t_0} - \mathbf{\Omega}^{t_0-1}\|_F^2.
 \end{aligned}$$

**Step 5.** In this step, we show that the potential function must be lower bounded. Observe that the augmented Lagrangian is given by

$$\begin{aligned}
 & L_{\beta^{r+1}}(\mathbf{X}^{r+1}, Y^{r+1}, \mathbf{\Omega}^{r+1}) \\
 & = f(\mathbf{X}^{r+1}, Y^{r+1}) + \langle \mathbf{\Omega}^{r+1}, \mathbf{A}\mathbf{X}^{r+1} \rangle + \frac{\beta^{r+1}}{2} \langle \mathbf{A}\mathbf{X}^{r+1}, \mathbf{A}\mathbf{X}^{r+1} \rangle \\
 & = f(\mathbf{X}^{r+1}, Y^{r+1}) + \left\langle \mathbf{\Omega}^{r+1}, \frac{\mathbf{\Omega}^{r+1} - \mathbf{\Omega}^r}{\beta^{r+1}} \right\rangle + \frac{\beta^{r+1}}{2} \langle \mathbf{A}\mathbf{X}^{r+1}, \mathbf{A}\mathbf{X}^{r+1} \rangle \\
 & = f(\mathbf{X}^{r+1}, Y^{r+1}) + \frac{1}{2\beta^{r+1}} \left( \|\mathbf{\Omega}^{r+1}\|_F^2 - \|\mathbf{\Omega}^r\|_F^2 + \|\mathbf{\Omega}^{r+1} - \mathbf{\Omega}^r\|_F^2 \right) + \frac{\beta^{r+1}}{2} \langle \mathbf{A}\mathbf{X}^{r+1}, \mathbf{A}\mathbf{X}^{r+1} \rangle \\
 & = f(\mathbf{X}^{r+1}, Y^{r+1}) + \frac{1}{2\beta^{r+1}} \|\mathbf{\Omega}^{r+1}\|_F^2 - \frac{1}{2\beta^r} \|\mathbf{\Omega}^r\|_F^2 + \left( \frac{1}{2\beta^r} - \frac{1}{2\beta^{r+1}} \right) \|\mathbf{\Omega}^r\|_F^2 + \frac{1}{2\beta^{r+1}} \|\mathbf{\Omega}^{r+1} - \mathbf{\Omega}^r\|_F^2 \\
 & \quad + \frac{\beta^{r+1}}{2} \langle \mathbf{A}\mathbf{X}^{r+1}, \mathbf{A}\mathbf{X}^{r+1} \rangle \\
 & \geq f(\mathbf{X}^{r+1}, Y^{r+1}) + \frac{1}{2\beta^{r+1}} \|\mathbf{\Omega}^{r+1}\|_F^2 - \frac{1}{2\beta^r} \|\mathbf{\Omega}^r\|_F^2 + \frac{1}{2\beta^{r+1}} \|\mathbf{\Omega}^{r+1} - \mathbf{\Omega}^r\|_F^2 + \frac{\beta^{r+1}}{2} \langle \mathbf{A}\mathbf{X}^{r+1}, \mathbf{A}\mathbf{X}^{r+1} \rangle
 \end{aligned}$$

Thus, following the similar argument in the Step 5 of the proof of Theorem 2, we conclude that the potential function  $L_{\beta^{r+1}}(\mathbf{X}^{r+1}, Y^{r+1}, \mathbf{\Omega}^{r+1})$  is lower bounded for all  $r$ .

Now that we have shown the descent and the lower boundedness of the potential function, the rest of the proof follows the same arguments as Step 6 - Step 7 of Theorem 2, therefore is omitted.

## References

- Allen-Zhu, Z. and Hazan, E. Variance Reduction for Faster Non-Convex Optimization. In *Proceedings of the 33rd International Conference on Machine Learning, ICML, 2016*.
- Antoniadis, A., Gijbels, I., and Nikolova, M. Penalized likelihood regression for generalized linear models with non-quadratic penalties. *Annals of the Institute of Statistical Mathematics*, 63(3):585–615, 2009.
- Aybat, N-S. and Hamedani, E-Y. A primal-dual method for conic constrained distributed optimization problems. *Advances in Neural Information Processing Systems*, 2016.
- Bertsekas, D. P. *Constrained Optimization and Lagrange Multiplier Method*. Academic Press, 1982.
- Bertsekas, D. P. and Tsitsiklis, J. N. *Neuro-Dynamic Programming*. Athena Scientific, Belmont, MA, 1996.
- Bianchi, P. and Jakubowicz, J. Convergence of a multi-agent projected stochastic gradient algorithm for non-convex optimization. *IEEE Transactions on Automatic Control*, 58(2):391–405, 2013.
- Bjornson, E. and Jorswieck, E. Optimal resource allocation in coordinated multi-cell systems. *Foundations and Trends in Communications and Information Theory*, 9, 2013.
- Cevher, V., Becker, S., and Schmidt, M. Convex optimization for big data: Scalable, randomized, and parallel algorithms for big data analytics. *IEEE Signal Processing Magazine*, 31(5):32–43, 2014.
- Defazio, A., Bach, F., and Lacoste-Julien, S. Saga: A fast incremental gradient method with support for non-strongly convex composite objectives. In *The Proceeding of NIPS*, 2014.
- Forero, P. A., Cano, A., and Giannakis, G. B. Consensus-based distributed support vector machines. *Journal of Machine Learning Research*, 11(May):1663–1707, 2010.
- Giannakis, G. B., Ling, Q., Mateos, G., Schizas, I. D., and Zhu, H. Decentralized learning for wireless communications and networking. *arXiv preprint arXiv:1503.08855*, 2015.
- H.-T. Wai, T.-H. Chang and Scaglione, A. A consensus-based decentralized algorithm for non-convex optimization with application to dictionary learning. In *the Proceedings of the IEEE ICASSP*, 2015.

|      |                                                                                                                                                                                                                                             |      |
|------|---------------------------------------------------------------------------------------------------------------------------------------------------------------------------------------------------------------------------------------------|------|
| 3410 | Hajinezhad, D., Hong, M., Zhao, T., and Wang, Z. Nestt: A nonconvex primal-dual splitting method for distributed and stochastic optimization. In <i>Advances in Neural Information Processing Systems 29</i> , pp. 3215–3223. 2016.         | 3465 |
| 3411 |                                                                                                                                                                                                                                             | 3466 |
| 3412 | Hong, M., Luo, Z.-Q., and Razaviyayn, M. Convergence analysis of alternating direction method of multipliers for a family of nonconvex problems. 2014. technical report, University of Minnesota.                                           | 3467 |
| 3413 |                                                                                                                                                                                                                                             | 3468 |
| 3414 |                                                                                                                                                                                                                                             | 3469 |
| 3415 | Johnson, R. and Zhang, T. Accelerating stochastic gradient descent using predictive variance reduction. In <i>the Proceedings of the Neural Information Processing (NIPS)</i> . 2013.                                                       | 3470 |
| 3416 |                                                                                                                                                                                                                                             | 3471 |
| 3417 | Ling, Q., Xu, Y., Yin, W., and Wen, Z. Decentralized low-rank matrix completion. In <i>2012 IEEE International Conference on Acoustics, Speech and Signal Processing (ICASSP)</i> , pp. 2925–2928, March 2012.                              | 3472 |
| 3418 |                                                                                                                                                                                                                                             | 3473 |
| 3419 | Ling, Q., Shi, W., Wu, G., and Ribeiro, A. DLM: Decentralized linearized alternating direction method of multipliers. <i>IEEE Transactions on Signal Processing</i> , 63(15):4051–4064, Aug 2015.                                           | 3474 |
| 3420 |                                                                                                                                                                                                                                             | 3475 |
| 3421 |                                                                                                                                                                                                                                             | 3476 |
| 3422 | Lobel, I. and Ozdaglar, A. Distributed subgradient methods for convex optimization over random networks. <i>Automatic Control, IEEE Transactions on</i> , 56(6):1291–1306, 2011.                                                            | 3477 |
| 3423 |                                                                                                                                                                                                                                             | 3478 |
| 3424 | Lobel, I., Ozdaglar, A., and Feijer, D. Distributed multi-agent optimization with state-dependent communication. <i>Mathematical Programming</i> , 129(2):255–284, 2011.                                                                    | 3479 |
| 3425 |                                                                                                                                                                                                                                             | 3480 |
| 3426 | Lorenzo, P. Di and Scutari, G. Next: In-network nonconvex optimization. <i>IEEE Transactions on Signal and Information Processing over Networks</i> , 2(2):120–136, 2016.                                                                   | 3481 |
| 3427 |                                                                                                                                                                                                                                             | 3482 |
| 3428 |                                                                                                                                                                                                                                             | 3483 |
| 3429 | Nedic, A. and Olshevsky, A. Distributed optimization over time-varying directed graphs. <i>IEEE Transactions on Automatic Control</i> , 60(3):601–615, 2015.                                                                                | 3484 |
| 3430 |                                                                                                                                                                                                                                             | 3485 |
| 3431 | Nedic, A. and Ozdaglar, A. Cooperative distributed multi-agent optimization. In <i>Convex Optimization in Signal Processing and Communications</i> . Cambridge University Press, 2009a.                                                     | 3486 |
| 3432 |                                                                                                                                                                                                                                             | 3487 |
| 3433 | Nedic, A. and Ozdaglar, A. Distributed subgradient methods for multi-agent optimization. <i>IEEE Transactions on Automatic Control</i> , 54(1):48–61, 2009b.                                                                                | 3488 |
| 3434 |                                                                                                                                                                                                                                             | 3489 |
| 3435 |                                                                                                                                                                                                                                             | 3490 |
| 3436 | Powell, M. M. D. An efficient method for nonlinear constraints in minimization problems. In <i>Optimization</i> . Academic Press, 1969.                                                                                                     | 3491 |
| 3437 |                                                                                                                                                                                                                                             | 3492 |
| 3438 | Rahmani, M. and Atia, G. A decentralized approach to robust subspace recovery. In <i>2015 53rd Annual Allerton Conference on Communication, Control, and Computing (Allerton)</i> , pp. 802–807. IEEE, 2015.                                | 3493 |
| 3439 |                                                                                                                                                                                                                                             | 3494 |
| 3440 | Reddi, S., Sra, S., Póczos, B., and Smola, A. Fast incremental method for nonconvex optimization. <i>arXiv preprint arXiv:1603.06159</i> , 2016.                                                                                            | 3495 |
| 3441 |                                                                                                                                                                                                                                             | 3496 |
| 3442 |                                                                                                                                                                                                                                             | 3497 |
| 3443 | Scardapane, S. and Lorenzo, P. Di. A framework for parallel and distributed training of neural networks. <i>arXiv preprint arXiv:1610.07448</i> , 2016.                                                                                     | 3498 |
| 3444 |                                                                                                                                                                                                                                             | 3499 |
| 3445 | Scardapane, S., Fierimonte, R., Lorenzo, P. Di, Panella, M., and Uncini, A. Distributed semi-supervised support vector machines. <i>Neural Networks</i> , 80:43–52, 2016.                                                                   | 3500 |
| 3446 |                                                                                                                                                                                                                                             | 3501 |
| 3447 | Schmidt, M., Roux, N. Le, and Bach., F. Minimizing finite sums with the stochastic average gradient. 2013. Technical report, INRIA.                                                                                                         | 3502 |
| 3448 |                                                                                                                                                                                                                                             | 3503 |
| 3449 |                                                                                                                                                                                                                                             | 3504 |
| 3450 | Shi, W., Ling, Q., Wu, G., and Yin, W. Extra: An exact first-order algorithm for decentralized consensus optimization. <i>SIAM Journal on Optimization</i> , 25(2):944–966, 2014.                                                           | 3505 |
| 3451 |                                                                                                                                                                                                                                             | 3506 |
| 3452 | Tatarenko, T. and Touri, B. Non-convex distributed optimization. 2015. arXiv Preprint: arXiv:1512.00895.                                                                                                                                    | 3507 |
| 3453 |                                                                                                                                                                                                                                             | 3508 |
| 3454 | Yan, F., Sundaram, S., Vishwanathan, S. V. N., and Qi, Y. Distributed autonomous online learning: Regrets and intrinsic privacy-preserving properties. <i>IEEE Transactions on Knowledge and Data Engineering</i> , 25(11):2483–2493, 2013. | 3509 |
| 3455 |                                                                                                                                                                                                                                             | 3510 |
| 3456 | Zhu, M. and Martinez, S. An approximate dual subgradient algorithm for multi-agent non-convex optimization. In <i>49th IEEE Conference on Decision and Control (CDC)</i> , pp. 7487–7492, 2010.                                             | 3511 |
| 3457 |                                                                                                                                                                                                                                             | 3512 |
| 3458 | Zlobec, S. On the liu–floudas convexification of smooth programs. <i>Journal of Global Optimization</i> , 32(3):401–407, 2005.                                                                                                              | 3513 |
| 3459 |                                                                                                                                                                                                                                             | 3514 |
| 3460 |                                                                                                                                                                                                                                             | 3515 |
| 3461 |                                                                                                                                                                                                                                             | 3516 |
| 3462 |                                                                                                                                                                                                                                             | 3517 |
| 3463 |                                                                                                                                                                                                                                             | 3518 |
| 3464 |                                                                                                                                                                                                                                             | 3519 |
